# Supplementary material
Source: PubMed Central journal article supplement (PMC7655334)
Supplement: 16-00797.pdf [file 16-00797.pdf]

**On-line Table 1A: Clinical characteristics of the discovery (optimal setting determination) and validation (diagnostic performance test) groups in test 1**

|                        | Discovery Group |              |                    | Validation Group |             |                    |
|------------------------|-----------------|--------------|--------------------|------------------|-------------|--------------------|
|                        | AD (n = 142)    | HS (n = 142) | P Value            | AD (n = 16)      | HS (n = 16) | P Value            |
| Age (yr)               | 69 ± 8          | 68 ± 8       | .772 <sup>a</sup>  | 70 ± 7           | 68 ± 8      | .550 <sup>a</sup>  |
| Onset age (yr)         | 67 ± 9          | –            |                    | 68 ± 7           | –           |                    |
| Sex (M/F)              | 73:69           | 80:62        | .002 <sup>b</sup>  | 7:9              | 7:9         | 1.000 <sup>b</sup> |
| MMSE                   | 21.7 ± 3.6      | 29.0 ± 0.7   | <.001 <sup>a</sup> | 22.3 ± 3.6       | 29.3 ± 0.7  | <.001 <sup>a</sup> |
| CDR (0.5/1)            | 18/124          | –            |                    | 2/14             | –           |                    |
| Term of education (yr) | 11.8 ± 2.6      | 12.3 ± 2.9   | .100 <sup>c</sup>  | 11.6 ± 2.6       | 12.3 ± 3.1  | .541 <sup>c</sup>  |

<sup>a</sup> ANOVA.

<sup>b</sup>  $\chi^2$  test.

<sup>c</sup> Kruskal-Wallis test.

**On-line Table 1B: Results of univariate and multivariate analyses for the discrimination of AD from HS in test 1 when the smoothing kernel was set to zero millimeters<sup>a</sup>**

|                     |                           | Univariate Analysis                         |         | Multivariate Analysis                       |         |
|---------------------|---------------------------|---------------------------------------------|---------|---------------------------------------------|---------|
|                     |                           | Likelihood Ratio<br>$\chi^2$ Test Statistic | P Value | Likelihood Ratio<br>$\chi^2$ Test Statistic | P Value |
| Modulation +<br>ROI | Amygdala                  | 77.03                                       | <.001   | 85.14                                       | <.001   |
|                     | Posterior cingulate gyrus | 8.75                                        | .003    | 16.86                                       | <.001   |
|                     | Precuneus                 | 2.13                                        | .144    |                                             |         |
|                     | Hippocampus               | 50.14                                       | <.001   |                                             |         |
|                     | Parahippocampus           | 24.85                                       | <.001   |                                             |         |
|                     | Frontal lobe              | 0.02                                        | .888    |                                             |         |
|                     | Occipital lobe            | 3.31                                        | .069    |                                             |         |
|                     | Parietal lobe             | 3.81                                        | .051    |                                             |         |
|                     | Temporal lobe             | 5.12                                        | .024    |                                             |         |
| Age                 |                           | 0.08                                        | .771    |                                             |         |
| Modulation –<br>ROI | Amygdala                  | 17.96                                       | <.001   |                                             |         |
|                     | Posterior cingulate gyrus | 13.55                                       | <.001   |                                             |         |
|                     | Precuneus                 | 3.79                                        | .051    |                                             |         |
|                     | Hippocampus               | 111.92                                      | <.001   | 111.92                                      | <.001   |
|                     | Parahippocampus           | 35.76                                       | <.001   |                                             |         |
|                     | Frontal lobe              | <.01                                        | .948    |                                             |         |
|                     | Occipital lobe            | 0.03                                        | .863    |                                             |         |
|                     | Parietal lobe             | 2.22                                        | .136    |                                             |         |
|                     | Temporal lobe             | 2.83                                        | .092    |                                             |         |
| Age                 |                           | 0.08                                        | .771    |                                             |         |

<sup>a</sup> Likelihood ratio  $\chi^2$  test statistic and P values were determined by univariate and multivariate logistic regression analyses.

**On-line Table 1C: Results of univariate and multivariate analyses for the discrimination of AD from HS in test 1 when the smoothing kernel was set to 4 mm<sup>a</sup>**

|                     |                           | Univariate Analysis                         |         | Multivariate Analysis                       |         |
|---------------------|---------------------------|---------------------------------------------|---------|---------------------------------------------|---------|
|                     |                           | Likelihood Ratio<br>$\chi^2$ Test Statistic | P Value | Likelihood Ratio<br>$\chi^2$ Test Statistic | P Value |
| Modulation +<br>ROI | Amygdala                  | 87.65                                       | <.001   | 88.98                                       | <.001   |
|                     | Posterior cingulate gyrus | 6.78                                        | .009    |                                             |         |
|                     | Precuneus                 | 2.52                                        | .113    |                                             |         |
|                     | Hippocampus               | 32.11                                       | <.001   |                                             |         |
|                     | Parahippocampus           | 25.23                                       | <.001   |                                             |         |
|                     | Frontal lobe              | 1.23                                        | .267    |                                             |         |
|                     | Occipital lobe            | 1.72                                        | .189    |                                             |         |
|                     | Parietal lobe             | 8.82                                        | .003    |                                             |         |
|                     | Temporal lobe             | 12.63                                       | <.001   |                                             |         |
| Age                 | 0.08                      | .771                                        |         |                                             |         |
| Modulation –<br>ROI | Amygdala                  | 32.40                                       | <.001   | 106.22                                      | <.001   |
|                     | Posterior cingulate gyrus | 4.44                                        | .035    |                                             |         |
|                     | Precuneus                 | 3.51                                        | .061    |                                             |         |
|                     | Hippocampus               | 106.22                                      | <.001   |                                             |         |
|                     | Parahippocampus           | 35.76                                       | <.001   |                                             |         |
|                     | Frontal lobe              | 1.53                                        | .216    |                                             |         |
|                     | Occipital lobe            | 0.24                                        | .627    |                                             |         |
|                     | Parietal lobe             | 2.85                                        | .091    |                                             |         |
|                     | Temporal lobe             | 10.51                                       | .001    |                                             |         |
| Age                 | 0.08                      | .771                                        |         |                                             |         |

<sup>a</sup> Likelihood ratio  $\chi^2$  test statistic and *P* values were determined by univariate and multivariate logistic regression analyses.

**On-line Table 1D: Results of univariate and multivariate analyses for the discrimination of AD from HS in test 1 when the smoothing kernel was set to 8 mm<sup>a</sup>**

|                     |                           | Univariate Analysis                         |         | Multivariate Analysis                       |         |
|---------------------|---------------------------|---------------------------------------------|---------|---------------------------------------------|---------|
|                     |                           | Likelihood Ratio<br>$\chi^2$ Test Statistic | P Value | Likelihood Ratio<br>$\chi^2$ Test Statistic | P Value |
| Modulation +<br>ROI | Amygdala                  | 77.46                                       | <.001   | 92.25                                       | <.001   |
|                     | Posterior cingulate gyrus | 4.33                                        | .037    |                                             |         |
|                     | Precuneus                 | 2.16                                        | .141    |                                             |         |
|                     | Hippocampus               | 23.18                                       | <.001   |                                             |         |
|                     | Parahippocampus           | 20.94                                       | <.001   |                                             |         |
|                     | Frontal lobe              | 4.04                                        | .044    |                                             |         |
|                     | Occipital lobe            | 1.80                                        | .180    |                                             |         |
|                     | Parietal lobe             | 8.54                                        | .004    |                                             |         |
|                     | Temporal lobe             | 15.58                                       | <.001   |                                             |         |
| Age                 | 0.08                      | .771                                        |         |                                             |         |
| Modulation –<br>ROI | Amygdala                  | 55.10                                       | <.001   | 57.9                                        | .016    |
|                     | Posterior cingulate gyrus | 0.71                                        | .399    |                                             |         |
|                     | Precuneus                 | 2.30                                        | .130    |                                             |         |
|                     | Hippocampus               | 94.24                                       | <.001   |                                             |         |
|                     | Parahippocampus           | 23.95                                       | <.001   |                                             |         |
|                     | Frontal lobe              | 5.70                                        | .017    |                                             |         |
|                     | Occipital lobe            | 0.01                                        | .905    |                                             |         |
|                     | Parietal lobe             | 10.88                                       | .001    |                                             |         |
|                     | Temporal lobe             | 17.48                                       | <.001   |                                             |         |
| Age                 | 0.08                      | .771                                        |         |                                             |         |

<sup>a</sup> Likelihood ratio  $\chi^2$  test statistic and *P* values were determined by univariate and multivariate logistic regression analyses.

**On-line Table 1E: Results of univariate and multivariate analyses for the discrimination of AD from HS in test 1 when the smoothing kernel was set to 12 mm<sup>a</sup>**

|                     |                           | Univariate Analysis                         |         | Multivariate Analysis                       |         |       |       |
|---------------------|---------------------------|---------------------------------------------|---------|---------------------------------------------|---------|-------|-------|
|                     |                           | Likelihood Ratio<br>$\chi^2$ Test Statistic | P Value | Likelihood Ratio<br>$\chi^2$ Test Statistic | P Value |       |       |
| Modulation +<br>ROI | Amygdala                  | 73.05                                       | <.001   | 90.36                                       | <.001   |       |       |
|                     | Posterior cingulate gyrus | 3.23                                        | .072    |                                             |         |       |       |
|                     | Precuneus                 | 2.47                                        | .116    |                                             |         |       |       |
|                     | Hippocampus               | 19.21                                       | <.001   |                                             |         |       |       |
|                     | Parahippocampus           | 15.42                                       | <.001   |                                             |         |       |       |
|                     | Frontal lobe              | 4.91                                        | .028    |                                             |         | 9.39  | .002  |
|                     | Occipital lobe            | 1.68                                        | .195    |                                             |         |       |       |
|                     | Parietal lobe             | 10.70                                       | .001    |                                             |         |       |       |
|                     | Temporal lobe             | 18.63                                       | <.001   |                                             |         | 24.26 | <.001 |
| Age                 | 0.08                      | .771                                        |         |                                             |         |       |       |
| Modulation –<br>ROI | Amygdala                  | 70.24                                       | <.001   | 19.16                                       | <.001   |       |       |
|                     | Posterior cingulate gyrus | 0.01                                        | .938    |                                             |         |       |       |
|                     | Precuneus                 | 1.47                                        | .226    |                                             |         |       |       |
|                     | Hippocampus               | 61.34                                       | <.001   |                                             |         |       |       |
|                     | Parahippocampus           | 12.89                                       | <.001   |                                             |         |       |       |
|                     | Frontal lobe              | 7.66                                        | .006    |                                             |         |       |       |
|                     | Occipital lobe            | 0.01                                        | .904    |                                             |         |       |       |
|                     | Parietal lobe             | 11.07                                       | .001    |                                             |         | 10.58 | .001  |
|                     | Temporal lobe             | 20.95                                       | <.001   |                                             |         |       |       |
| Age                 | 0.08                      | .771                                        |         |                                             |         |       |       |

<sup>a</sup> Likelihood ratio  $\chi^2$  test statistic and *P* values were determined by univariate and multivariate logistic regression analyses.

**On-line Table 1F: Results of univariate and multivariate analyses for the discrimination of AD from HS in test 1 when the smoothing kernel was set to 16 mm<sup>a</sup>**

|                     |                           | Univariate Analysis                         |         | Multivariate Analysis                       |         |       |       |
|---------------------|---------------------------|---------------------------------------------|---------|---------------------------------------------|---------|-------|-------|
|                     |                           | Likelihood Ratio<br>$\chi^2$ Test Statistic | P Value | Likelihood Ratio<br>$\chi^2$ Test Statistic | P Value |       |       |
| Modulation +<br>ROI | Amygdala                  | 67.03                                       | <.001   | 84.69                                       | <.001   |       |       |
|                     | Posterior cingulate gyrus | 2.27                                        | .132    |                                             |         |       |       |
|                     | Precuneus                 | 2.21                                        | .137    |                                             |         |       |       |
|                     | Hippocampus               | 16.94                                       | <.001   |                                             |         |       |       |
|                     | Parahippocampus           | 11.52                                       | .001    |                                             |         |       |       |
|                     | Frontal lobe              | 5.13                                        | .024    |                                             |         | 8.40  | .004  |
|                     | Occipital lobe            | 1.34                                        | .248    |                                             |         |       |       |
|                     | Parietal lobe             | 12.01                                       | .001    |                                             |         |       |       |
|                     | Temporal lobe             | 21.71                                       | <.001   |                                             |         | 25.14 | <.001 |
| Age                 | 0.08                      | .771                                        |         |                                             |         |       |       |
| Modulation –<br>ROI | Amygdala                  | 69.49                                       | <.001   | 69.41                                       | <.001   |       |       |
|                     | Posterior cingulate gyrus | 0.17                                        | .681    |                                             |         |       |       |
|                     | Precuneus                 | 1.80                                        | .180    |                                             |         |       |       |
|                     | Hippocampus               | 37.71                                       | <.001   |                                             |         |       |       |
|                     | Parahippocampus           | 7.11                                        | .008    |                                             |         |       |       |
|                     | Frontal lobe              | 10.01                                       | .002    |                                             |         |       |       |
|                     | Occipital lobe            | 0.30                                        | .585    |                                             |         |       |       |
|                     | Parietal lobe             | 12.25                                       | .001    |                                             |         | 12.16 | .001  |
|                     | Temporal lobe             | 24.18                                       | <.001   |                                             |         |       |       |
| Age                 | 0.08                      | .771                                        |         |                                             |         |       |       |

<sup>a</sup> Likelihood ratio  $\chi^2$  test statistic and *P* values were determined by univariate and multivariate logistic regression analyses.

**On-line Table 1G: Results of univariate and multivariate analyses for the discrimination of AD from HS in test 1 when the smoothing kernel was set to 20 mm<sup>a</sup>**

|                     |                           | Univariate Analysis                         |         | Multivariate Analysis                       |         |       |       |
|---------------------|---------------------------|---------------------------------------------|---------|---------------------------------------------|---------|-------|-------|
|                     |                           | Likelihood Ratio<br>$\chi^2$ Test Statistic | P Value | Likelihood Ratio<br>$\chi^2$ Test Statistic | P Value |       |       |
| Modulation +<br>ROI | Amygdala                  | 60.85                                       | <.001   | 68.38                                       | <.001   |       |       |
|                     | Posterior cingulate gyrus | 0.90                                        | .343    |                                             |         |       |       |
|                     | Precuneus                 | 1.85                                        | .174    |                                             |         |       |       |
|                     | Hippocampus               | 16.51                                       | <.001   |                                             |         |       |       |
|                     | Parahippocampus           | 10.00                                       | .002    |                                             |         |       |       |
|                     | Frontal lobe              | 5.57                                        | .018    |                                             |         | 7.97  | .005  |
|                     | Occipital lobe            | 1.48                                        | .223    |                                             |         |       |       |
|                     | Parietal lobe             | 11.42                                       | .001    |                                             |         | 23.74 | <.001 |
|                     | Temporal lobe             | 22.96                                       | <.001   |                                             |         | –     | –     |
| Age                 | 0.08                      | .771                                        | –       | –                                           |         |       |       |
| Modulation –<br>ROI | Amygdala                  | 61.79                                       | <.001   | 63.27                                       | <.001   |       |       |
|                     | Posterior cingulate gyrus | 0.52                                        | .473    |                                             |         |       |       |
|                     | Precuneus                 | 2.09                                        | .148    |                                             |         |       |       |
|                     | Hippocampus               | 26.68                                       | <.001   |                                             |         |       |       |
|                     | Parahippocampus           | 5.14                                        | .023    |                                             |         |       |       |
|                     | Frontal lobe              | 8.87                                        | .003    |                                             |         |       |       |
|                     | Occipital lobe            | 0.18                                        | .669    |                                             |         |       |       |
|                     | Parietal lobe             | 11.18                                       | .001    |                                             |         | 12.65 | <.001 |
|                     | Temporal lobe             | 21.98                                       | <.001   |                                             |         | –     | –     |
| Age                 | 0.08                      | .771                                        | –       | –                                           |         |       |       |

<sup>a</sup>Likelihood ratio  $\chi^2$  test statistic and *P* values were determined by univariate and multivariate logistic regression analyses.

**Table 1H: Optimal ROI and diagnostic performance expressed as area under the curve for each image-processing setting in test 1<sup>a</sup>**

| Image-Processing Condition |                            | ROI                       | Likelihood Ratio<br>$\chi^2$ Test Statistic | P Value | AUC   |
|----------------------------|----------------------------|---------------------------|---------------------------------------------|---------|-------|
| Modulation                 | Smoothing Kernel Size (mm) |                           |                                             |         |       |
| +                          | Nonsmoothed                | Amygdala                  | 93.89                                       | <.001   | 0.891 |
|                            |                            | Posterior cingulate gyrus |                                             |         |       |
|                            | 4                          | Amygdala                  | 97.80                                       | <.001   | 0.840 |
|                            |                            | Parietal lobe             |                                             |         |       |
|                            | 8                          | Amygdala                  | 105.58                                      | <.001   | 0.875 |
|                            |                            | Frontal lobe              |                                             |         |       |
|                            | 12                         | Parietal lobe             | 106.36                                      | <.001   | 0.879 |
|                            |                            | Amygdala                  |                                             |         |       |
|                            | 16                         | Frontal lobe              | 101.62                                      | <.001   | 0.875 |
|                            |                            | Parietal lobe             |                                             |         |       |
|                            | 20                         | Amygdala                  | 95.61                                       | <.001   | 0.851 |
|                            |                            | Parahippocampus           |                                             |         |       |
| –                          | Nonsmoothed                | Hippocampus               | 111.92                                      | <.001   | 0.830 |
|                            |                            | Parietal lobe             |                                             |         |       |
|                            | 4                          | Hippocampus               | 106.22                                      | <.001   | 0.766 |
|                            |                            | Parietal lobe             |                                             |         |       |
|                            | 8                          | Amygdala                  | 108.60                                      | <.001   | 0.766 |
|                            |                            | Hippocampus               |                                             |         |       |
|                            | 12                         | Parietal lobe             | 81.18                                       | <.001   | 0.848 |
|                            |                            | Amygdala                  |                                             |         |       |
|                            | 16                         | Posterior cingulate gyrus | 81.65                                       | <.001   | 0.789 |
|                            |                            | Amygdala                  |                                             |         |       |
|                            | 20                         | Parietal lobe             | 74.45                                       | <.001   | 0.773 |
|                            |                            | Amygdala                  |                                             |         |       |
|                            |                            | Parietal lobe             |                                             |         |       |

<sup>a</sup>Likelihood ratio  $\chi^2$  test statistic and *P* values were determined by multivariate logistic regression analyses.

**On-line Table 2A: Clinical characteristics of the discovery (optimal setting determination) and validation (diagnostic performance test) groups in test 2**

|                        | Discovery Group |              |                    | Validation Group |             |                    |
|------------------------|-----------------|--------------|--------------------|------------------|-------------|--------------------|
|                        | AD (n = 142)    | HS (n = 142) | P Value            | AD (n = 16)      | HS (n = 16) | P Value            |
| Age (yr)               | 69 ± 8          | 68 ± 8       | .636 <sup>a</sup>  | 68 ± 9           | 68 ± 8      | .967 <sup>a</sup>  |
| Onset age (yr)         | 67 ± 8          | –            |                    | 67 ± 9           | –           |                    |
| Sex (M/F)              | 75:67           | 76:66        | .905 <sup>b</sup>  | 5:11             | 11:5        | .104 <sup>b</sup>  |
| MMSE                   | 21.8 ± 3.5      | 29.1 ± 0.7   | <.001 <sup>a</sup> | 20.9 ± 3.9       | 29.2 ± 0.8  | <.001 <sup>a</sup> |
| CDR (0.5/1)            | 17/125          | –            |                    | 3/13             | –           |                    |
| Term of education (yr) | 11.8 ± 2.6      | 12.3 ± 2.9   | .127 <sup>c</sup>  | 11.4 ± 2.7       | 12.4 ± 2.5  | .322 <sup>c</sup>  |

<sup>a</sup> ANOVA.

<sup>b</sup>  $\chi^2$  test.

<sup>c</sup> Kruskal-Wallis test.

**On-line Table 2B: Results of univariate and multivariate analyses for the discrimination of AD from HS in test 2 when the smoothing kernel was set to zero millimeters<sup>a</sup>**

|                     |                           | Univariate Analysis                         |         | Multivariate Analysis                       |         |
|---------------------|---------------------------|---------------------------------------------|---------|---------------------------------------------|---------|
|                     |                           | Likelihood Ratio<br>$\chi^2$ Test Statistic | P Value | Likelihood Ratio<br>$\chi^2$ Test Statistic | P Value |
| Modulation +<br>ROI | Amygdala                  | 91.24                                       | <.001   | 96.63                                       | <.001   |
|                     | Posterior cingulate gyrus | 12.57                                       | .004    | 17.96                                       | <.001   |
|                     | Precuneus                 | 2.04                                        | .153    |                                             |         |
|                     | Hippocampus               | 53.37                                       | <.001   |                                             |         |
|                     | Parahippocampus           | 33.79                                       | <.001   |                                             |         |
|                     | Frontal lobe              | 0.07                                        | .797    |                                             |         |
|                     | Occipital lobe            | 3.60                                        | .058    |                                             |         |
|                     | Parietal lobe             | 2.35                                        | .125    |                                             |         |
|                     | Temporal lobe             | 6.72                                        | .001    |                                             |         |
| Age                 |                           | 0.23                                        | .634    |                                             |         |
| Modulation –<br>ROI | Amygdala                  | 28.49                                       | <.001   |                                             |         |
|                     | Posterior cingulate gyrus | 14.77                                       | <.001   |                                             |         |
|                     | Precuneus                 | 5.45                                        | .020    | 9.63                                        | .002    |
|                     | Hippocampus               | 103.92                                      | <.001   | 108.09                                      | <.001   |
|                     | Parahippocampus           | 39.63                                       | <.001   |                                             |         |
|                     | Frontal lobe              | 0.06                                        | .800    |                                             |         |
|                     | Occipital lobe            | 0.143                                       | .706    |                                             |         |
|                     | Parietal lobe             | 1.80                                        | .180    |                                             |         |
|                     | Temporal lobe             | 3.80                                        | .051    |                                             |         |
| Age                 |                           | 0.23                                        | .634    |                                             |         |

<sup>a</sup> Likelihood ratio  $\chi^2$  test statistic and P values were determined by univariate and multivariate logistic regression analyses.

**On-line Table 2C: Results of univariate and multivariate analyses for the discrimination of AD from HS in test 2 when the smoothing kernel was set to 4 mm<sup>a</sup>**

|                     |                           | Univariate Analysis                         |         | Multivariate Analysis                       |         |
|---------------------|---------------------------|---------------------------------------------|---------|---------------------------------------------|---------|
|                     |                           | Likelihood Ratio<br>$\chi^2$ Test Statistic | P Value | Likelihood Ratio<br>$\chi^2$ Test Statistic | P Value |
| Modulation +<br>ROI | Amygdala                  | 87.68                                       | <.001   | 93.92                                       | <.001   |
|                     | Posterior cingulate gyrus | 10.11                                       | .002    | 14.34                                       | <.001   |
|                     | Precuneus                 | 1.63                                        | .202    |                                             |         |
|                     | Hippocampus               | 35.43                                       | <.001   |                                             |         |
|                     | Parahippocampus           | 34.96                                       | <.001   |                                             |         |
|                     | Frontal lobe              | 1.96                                        | .161    |                                             |         |
|                     | Occipital lobe            | 2.34                                        | .126    |                                             |         |
|                     | Parietal lobe             | 5.82                                        | .016    |                                             |         |
|                     | Temporal lobe             | 13.51                                       | <.001   |                                             |         |
| Age                 |                           | 0.23                                        | .634    |                                             |         |
| Modulation –<br>ROI | Amygdala                  | 47.20                                       | <.001   |                                             |         |
|                     | Posterior cingulate gyrus | 14.77                                       | <.001   |                                             |         |
|                     | Precuneus                 | 4.53                                        | .033    | 6.82                                        | .009    |
|                     | Hippocampus               | 96.63                                       | <.001   | 63.05                                       | <.001   |
|                     | Parahippocampus           | 41.88                                       | <.001   | 7.30                                        | .007    |
|                     | Frontal lobe              | 1.63                                        | .201    |                                             |         |
|                     | Occipital lobe            | 0.10                                        | .756    |                                             |         |
|                     | Parietal lobe             | 2.21                                        | .137    |                                             |         |
|                     | Temporal lobe             | 10.73                                       | .001    |                                             |         |
| Age                 |                           | 0.23                                        | .634    |                                             |         |

<sup>a</sup> Likelihood ratio  $\chi^2$  test statistic and *P* values were determined by univariate and multivariate logistic regression analyses.

**On-line Table 2D: Results of univariate and multivariate analyses for the discrimination of AD from HS in test 2 when the smoothing kernel was set to 8 mm<sup>a</sup>**

|                     |                           | Univariate Analysis                         |         | Multivariate Analysis                       |         |
|---------------------|---------------------------|---------------------------------------------|---------|---------------------------------------------|---------|
|                     |                           | Likelihood Ratio<br>$\chi^2$ Test Statistic | P Value | Likelihood Ratio<br>$\chi^2$ Test Statistic | P Value |
| Modulation +<br>ROI | Amygdala                  | 84.36                                       | <.001   | 97.99                                       | <.001   |
|                     | Posterior cingulate gyrus | 7.25                                        | .007    |                                             |         |
|                     | Precuneus                 | 1.00                                        | .317    |                                             |         |
|                     | Hippocampus               | 28.32                                       | <.001   |                                             |         |
|                     | Parahippocampus           | 29.66                                       | <.001   |                                             |         |
|                     | Frontal lobe              | 4.91                                        | .027    | 8.36                                        | .004    |
|                     | Occipital lobe            | 2.41                                        | .121    |                                             |         |
|                     | Parietal lobe             | 6.13                                        | .013    | 17.35                                       | <.001   |
|                     | Temporal lobe             | 16.30                                       | <.001   |                                             |         |
| Age                 |                           | 0.23                                        | .634    |                                             |         |
| Modulation –<br>ROI | Amygdala                  | 65.74                                       | <.001   | 11.00                                       | .001    |
|                     | Posterior cingulate gyrus | 1.32                                        | .249    |                                             |         |
|                     | Precuneus                 | 3.19                                        | .074    |                                             |         |
|                     | Hippocampus               | 85.20                                       | <.001   | 28.64                                       | <.001   |
|                     | Parahippocampus           | 25.65                                       | <.001   |                                             |         |
|                     | Frontal lobe              | 5.51                                        | .019    |                                             |         |
|                     | Occipital lobe            | 0.11                                        | .731    |                                             |         |
|                     | Parietal lobe             | 9.38                                        | .002    | 6.46                                        | .011    |
|                     | Temporal lobe             | 18.27                                       | <.001   |                                             |         |
| Age                 |                           | 0.23                                        | .634    |                                             |         |

<sup>a</sup> Likelihood ratio  $\chi^2$  test statistic and *P* values were determined by univariate and multivariate logistic regression analyses.

**On-line Table 2E: Results of univariate and multivariate analyses for the discrimination of AD from HS in test 2 when the smoothing kernel was set to 12 mm<sup>a</sup>**

|                     |                           | Univariate Analysis                         |         | Multivariate Analysis                       |         |       |       |
|---------------------|---------------------------|---------------------------------------------|---------|---------------------------------------------|---------|-------|-------|
|                     |                           | Likelihood Ratio<br>$\chi^2$ Test Statistic | P Value | Likelihood Ratio<br>$\chi^2$ Test Statistic | P Value |       |       |
| Modulation +<br>ROI | Amygdala                  | 79.87                                       | <.001   | 96.35                                       | <.001   |       |       |
|                     | Posterior cingulate gyrus | 5.30                                        | .021    |                                             |         |       |       |
|                     | Precuneus                 | 0.86                                        | .354    |                                             |         |       |       |
|                     | Hippocampus               | 24.99                                       | <.001   |                                             |         |       |       |
|                     | Parahippocampus           | 22.61                                       | <.001   |                                             |         |       |       |
|                     | Frontal lobe              | 5.58                                        | .018    |                                             |         | 9.38  | .002  |
|                     | Occipital lobe            | 2.41                                        | .120    |                                             |         |       |       |
|                     | Parietal lobe             | 8.09                                        | .004    |                                             |         | 20.53 | <.001 |
|                     | Temporal lobe             | 19.06                                       | <.001   |                                             |         |       |       |
| Age                 | 0.23                      | .634                                        |         |                                             |         |       |       |
| Modulation –<br>ROI | Amygdala                  | 75.96                                       | <.001   | 24.07                                       | <.001   |       |       |
|                     | Posterior cingulate gyrus | 0.06                                        | .800    |                                             |         | 6.08  | .014  |
|                     | Precuneus                 | 2.40                                        | .121    |                                             |         |       |       |
|                     | Hippocampus               | 59.64                                       | <.001   |                                             |         |       |       |
|                     | Parahippocampus           | 14.60                                       | <.001   |                                             |         |       |       |
|                     | Frontal lobe              | 7.66                                        | .006    |                                             |         |       |       |
|                     | Occipital lobe            | 0.23                                        | .632    |                                             |         |       |       |
|                     | Parietal lobe             | 11.32                                       | .001    |                                             |         | 9.75  | .002  |
|                     | Temporal lobe             | 23.46                                       | <.001   |                                             |         |       |       |
| Age                 | 0.23                      | .634                                        |         |                                             |         |       |       |

<sup>a</sup> Likelihood ratio  $\chi^2$  test statistic and *P* values were determined by univariate and multivariate logistic regression analyses.

**On-line Table 2F: Results of univariate and multivariate analyses for the discrimination of AD from HS in test 2 when the smoothing kernel was set to 16 mm<sup>a</sup>**

|                     |                           | Univariate Analysis                         |         | Multivariate Analysis                       |         |       |       |
|---------------------|---------------------------|---------------------------------------------|---------|---------------------------------------------|---------|-------|-------|
|                     |                           | Likelihood Ratio<br>$\chi^2$ Test Statistic | P Value | Likelihood Ratio<br>$\chi^2$ Test Statistic | P Value |       |       |
| Modulation +<br>ROI | Amygdala                  | 73.95                                       | <.001   | 90.48                                       | <.001   |       |       |
|                     | Posterior cingulate gyrus | 3.63                                        | .057    |                                             |         |       |       |
|                     | Precuneus                 | 0.70                                        | .404    |                                             |         |       |       |
|                     | Hippocampus               | 22.30                                       | <.001   |                                             |         |       |       |
|                     | Parahippocampus           | 17.85                                       | <.001   |                                             |         |       |       |
|                     | Frontal lobe              | 5.27                                        | .022    |                                             |         | 7.69  | .006  |
|                     | Occipital lobe            | 1.86                                        | .172    |                                             |         |       |       |
|                     | Parietal lobe             | 9.92                                        | .002    |                                             |         | 21.67 | <.001 |
|                     | Temporal lobe             | 20.19                                       | <.001   |                                             |         |       |       |
| Age                 | 0.23                      | .634                                        |         |                                             |         |       |       |
| Modulation –<br>ROI | Amygdala                  | 72.61                                       | <.001   | 72.78                                       | <.001   |       |       |
|                     | Posterior cingulate gyrus | 0.54                                        | .461    |                                             |         |       |       |
|                     | Precuneus                 | 2.84                                        | .092    |                                             |         |       |       |
|                     | Hippocampus               | 39.25                                       | <.001   |                                             |         |       |       |
|                     | Parahippocampus           | 8.68                                        | .003    |                                             |         |       |       |
|                     | Frontal lobe              | 10.31                                       | .001    |                                             |         |       |       |
|                     | Occipital lobe            | 1.02                                        | .313    |                                             |         |       |       |
|                     | Parietal lobe             | 13.42                                       | <.001   |                                             |         | 13.59 | <.001 |
|                     | Temporal lobe             | 26.37                                       | <.001   |                                             |         |       |       |
| Age                 | 0.23                      | .634                                        |         |                                             |         |       |       |

<sup>a</sup> Likelihood ratio  $\chi^2$  test statistic and *P* values were determined by univariate and multivariate logistic regression analyses.

**On-line Table 2G: Results of univariate and multivariate analyses for the discrimination of AD from HS in test 2 when the smoothing kernel was set to 20 mm<sup>a</sup>**

|                     |                           | Univariate Analysis                         |         | Multivariate Analysis                       |         |
|---------------------|---------------------------|---------------------------------------------|---------|---------------------------------------------|---------|
|                     |                           | Likelihood Ratio<br>$\chi^2$ Test Statistic | P Value | Likelihood Ratio<br>$\chi^2$ Test Statistic | P Value |
| Modulation +<br>ROI | Amygdala                  | 67.37                                       | <.001   | 81.71                                       | <.001   |
|                     | Posterior cingulate gyrus | 1.58                                        | .209    |                                             |         |
|                     | Precuneus                 | 0.56                                        | .454    |                                             |         |
|                     | Hippocampus               | 22.12                                       | <.001   |                                             |         |
|                     | Parahippocampus           | 16.02                                       | <.001   |                                             |         |
|                     | Frontal lobe              | 4.49                                        | .034    |                                             |         |
|                     | Occipital lobe            | 1.85                                        | .174    |                                             |         |
|                     | Parietal lobe             | 10.68                                       | .001    |                                             |         |
|                     | Temporal lobe             | 21.67                                       | <.001   |                                             |         |
| Age                 | 0.23                      | .634                                        |         |                                             |         |
| Modulation –<br>ROI | Amygdala                  | 63.80                                       | <.001   | 65.72                                       | <.001   |
|                     | Posterior cingulate gyrus | 0.56                                        | .455    |                                             |         |
|                     | Precuneus                 | 3.37                                        | .067    |                                             |         |
|                     | Hippocampus               | 28.81                                       | <.001   |                                             |         |
|                     | Parahippocampus           | 7.46                                        | .006    |                                             |         |
|                     | Frontal lobe              | 9.71                                        | .002    |                                             |         |
|                     | Occipital lobe            | 1.13                                        | .288    |                                             |         |
|                     | Parietal lobe             | 13.56                                       | <.001   |                                             |         |
|                     | Temporal lobe             | 23.47                                       | <.001   |                                             |         |
| Age                 | 0.23                      | .634                                        |         |                                             |         |

<sup>a</sup>Likelihood ratio  $\chi^2$  test statistic and *P* values were determined by univariate and multivariate logistic regression analyses.

**On-line Table 2H: Optimal ROI and diagnostic performance expressed as area under the curve for each image-processing setting in test 2<sup>a</sup>**

| Image-Processing Condition |                            | ROI                       | Likelihood Ratio<br>$\chi^2$ Test Statistic | P Value | AUC   |
|----------------------------|----------------------------|---------------------------|---------------------------------------------|---------|-------|
| Modulation                 | Smoothing Kernel Size (mm) |                           |                                             |         |       |
| +                          | Nonsmoothed                | Amygdala                  | 109.20                                      | <.001   | 0.680 |
|                            |                            | Posterior cingulate gyrus |                                             |         |       |
| +                          | 4                          | Amygdala                  | 104.03                                      | <.001   | 0.711 |
|                            |                            | Posterior cingulate gyrus |                                             |         |       |
| +                          | 8                          | Amygdala                  | 109.31                                      | <.001   | 0.844 |
|                            |                            | Frontal lobe              |                                             |         |       |
|                            |                            | Parietal lobe             |                                             |         |       |
| +                          | 12                         | Amygdala                  | 109.95                                      | <.001   | 0.859 |
|                            |                            | Frontal lobe              |                                             |         |       |
|                            |                            | Parietal lobe             |                                             |         |       |
| +                          | 16                         | Amygdala                  | 105.00                                      | <.001   | 0.852 |
|                            |                            | Frontal lobe              |                                             |         |       |
|                            |                            | Parietal lobe             |                                             |         |       |
| +                          | 20                         | Amygdala                  | 92.39                                       | <.001   | 0.797 |
|                            |                            | Parietal lobe             |                                             |         |       |
| –                          | Nonsmoothed                | Hippocampus               | 113.55                                      | <.001   | 0.945 |
|                            |                            | Precuneus                 |                                             |         |       |
| –                          | 4                          | Hippocampus               | 110.23                                      | <.001   | 0.926 |
|                            |                            | Precuneus                 |                                             |         |       |
|                            |                            | Parahippocampus           |                                             |         |       |
| –                          | 8                          | Amygdala                  | 102.21                                      | <.001   | 0.918 |
|                            |                            | Hippocampus               |                                             |         |       |
|                            |                            | Parietal lobe             |                                             |         |       |
| –                          | 12                         | Amygdala                  | 86.38                                       | <.001   | 0.742 |
|                            |                            | Posterior cingulate gyrus |                                             |         |       |
|                            |                            | Parietal lobe             |                                             |         |       |
| –                          | 16                         | Amygdala                  | 86.20                                       | <.001   | 0.719 |
|                            |                            | Parietal lobe             |                                             |         |       |
| –                          | 20                         | Amygdala                  | 79.28                                       | <.001   | 0.723 |
|                            |                            | Parietal lobe             |                                             |         |       |

<sup>a</sup>Likelihood ratio  $\chi^2$  test statistic and *P* values were determined by multivariate logistic regression analyses.



**On-line Table 3A: Clinical characteristics of the discovery (optimal setting determination) and validation (diagnostic performance test) groups in test 3**

|                        | Discovery Group |              |                   | Validation Group |             |                     |
|------------------------|-----------------|--------------|-------------------|------------------|-------------|---------------------|
|                        | AD (n = 142)    | HS (n = 142) | P Value           | AD (n = 16)      | HS (n = 16) | P Value             |
| Age (yr)               | 69 ± 8          | 68 ± 8       | .588 <sup>a</sup> | 68 ± 9           | 68 ± 6      | .856 <sup>a</sup>   |
| Onset age (yr)         | 67 ± 8          | –            |                   | 66 ± 9           | –           |                     |
| Sex (M/F)              | 74:68           | 77:65        | .721 <sup>b</sup> | 6:10             | 10:6        | .155 <sup>b</sup>   |
| MMSE                   | 21.8 ± 3.6      | 29.1 ± 0.7   | <.00 <sup>a</sup> | 21.0 ± 3.3       | 29.3 ± 0.8  | <.0001 <sup>a</sup> |
| CDR (0.5/1)            | 17/125          | –            |                   | 3/13             | –           |                     |
| Term of education (yr) | 11.7 ± 2.6      | 12.2 ± 2.9   | .132 <sup>c</sup> | 11.9 ± 2.4       | 12.9 ± 2.8  | .288 <sup>c</sup>   |

<sup>a</sup> ANOVA.

<sup>b</sup>  $\chi^2$  test.

<sup>c</sup> Kruskal-Wallis test.

**On-line Table 3B: Results of univariate and multivariate analyses for the discrimination of AD from HS in test 3 when the smoothing kernel was set to zero millimeters<sup>a</sup>**

|                     |                           | Univariate Analysis                         |         | Multivariate Analysis                       |         |
|---------------------|---------------------------|---------------------------------------------|---------|---------------------------------------------|---------|
|                     |                           | Likelihood Ratio<br>$\chi^2$ Test Statistic | P Value | Likelihood Ratio<br>$\chi^2$ Test Statistic | P Value |
| Modulation +<br>ROI | Amygdala                  | 75.26                                       | <.001   | 81.58                                       | <.001   |
|                     | Posterior cingulate gyrus | 12.21                                       | .001    | 18.53                                       | <.001   |
|                     | Precuneus                 | 3.73                                        | .053    |                                             |         |
|                     | Hippocampus               | 46.44                                       | <.001   |                                             |         |
|                     | Parahippocampus           | 28.30                                       | <.001   |                                             |         |
|                     | Frontal lobe              | <.01                                        | .977    |                                             |         |
|                     | Occipital lobe            | 4.79                                        | .029    |                                             |         |
|                     | Parietal lobe             | 2.97                                        | .085    |                                             |         |
|                     | Temporal lobe             | 6.43                                        | .011    |                                             |         |
| Age                 |                           | 0.30                                        | .586    |                                             |         |
| Modulation –<br>ROI | Amygdala                  | 19.00                                       | <.001   |                                             |         |
|                     | Posterior cingulate gyrus | 16.64                                       | <.001   |                                             |         |
|                     | Precuneus                 | 8.30                                        | .004    | 12.91                                       | <.001   |
|                     | Hippocampus               | 107.85                                      | <.001   | 112.46                                      | <.001   |
|                     | Parahippocampus           | 33.70                                       | <.001   |                                             |         |
|                     | Frontal lobe              | 0.28                                        | .594    |                                             |         |
|                     | Occipital lobe            | <.01                                        | .965    |                                             |         |
|                     | Parietal lobe             | 2.46                                        | .117    |                                             |         |
|                     | Temporal lobe             | 3.69                                        | .055    |                                             |         |
| Age                 |                           | 0.30                                        | .586    |                                             |         |

<sup>a</sup> Likelihood ratio  $\chi^2$  test statistic and P values were determined by univariate and multivariate logistic regression analyses.

**On-line Table 3C: Results of univariate and multivariate analyses for the discrimination of AD from HS in test 3 when the smoothing kernel was set to 4 mm<sup>a</sup>**

|                     |                           | Univariate Analysis                         |         | Multivariate Analysis                       |         |
|---------------------|---------------------------|---------------------------------------------|---------|---------------------------------------------|---------|
|                     |                           | Likelihood Ratio<br>$\chi^2$ Test Statistic | P Value | Likelihood Ratio<br>$\chi^2$ Test Statistic | P Value |
| Modulation +<br>ROI | Amygdala                  | 74.17                                       | <.001   | 84.64                                       | <.001   |
|                     | Posterior cingulate gyrus | 9.15                                        | .003    | 5.67                                        | .017    |
|                     | Precuneus                 | 3.10                                        | .078    |                                             |         |
|                     | Hippocampus               | 28.07                                       | <.001   |                                             |         |
|                     | Parahippocampus           | 29.47                                       | <.001   |                                             |         |
|                     | Frontal lobe              | 1.00                                        | .317    |                                             |         |
|                     | Occipital lobe            | 2.73                                        | .099    |                                             |         |
|                     | Parietal lobe             | 7.31                                        | .007    | 7.48                                        | .006    |
|                     | Temporal lobe             | 13.41                                       | .003    |                                             |         |
| Age                 | 0.30                      | .586                                        |         |                                             |         |
| Modulation –<br>ROI | Amygdala                  | 29.86                                       | <.001   |                                             |         |
|                     | Posterior cingulate gyrus | 7.15                                        | .008    |                                             |         |
|                     | Precuneus                 | 4.19                                        | .041    | 9.88                                        | .002    |
|                     | Hippocampus               | 83.23                                       | <.001   | 69.40                                       | <.001   |
|                     | Parahippocampus           | 35.24                                       | <.001   | 6.50                                        | .013    |
|                     | Frontal lobe              | 1.37                                        | .242    |                                             |         |
|                     | Occipital lobe            | 0.917                                       | .338    |                                             |         |
|                     | Parietal lobe             | 2.08                                        | .150    |                                             |         |
|                     | Temporal lobe             | 9.25                                        | .002    |                                             |         |
| Age                 | 0.30                      | .586                                        |         |                                             |         |

<sup>a</sup> Likelihood ratio  $\chi^2$  test statistic and *P* values were determined by univariate and multivariate logistic regression analyses.

**On-line Table 3D: Results of univariate and multivariate analyses for the discrimination of AD from HS in test 3 when the smoothing kernel was set to 8 mm<sup>a</sup>**

|                     |                           | Univariate Analysis                         |         | Multivariate Analysis                       |         |
|---------------------|---------------------------|---------------------------------------------|---------|---------------------------------------------|---------|
|                     |                           | Likelihood Ratio<br>$\chi^2$ Test Statistic | P Value | Likelihood Ratio<br>$\chi^2$ Test Statistic | P Value |
| Modulation +<br>ROI | Amygdala                  | 71.16                                       | <.001   | 80.78                                       | <.001   |
|                     | Posterior cingulate gyrus | 6.76                                        | .009    |                                             |         |
|                     | Precuneus                 | 2.00                                        | .158    |                                             |         |
|                     | Hippocampus               | 19.69                                       | <.001   |                                             |         |
|                     | Parahippocampus           | 24.59                                       | <.001   |                                             |         |
|                     | Frontal lobe              | 3.27                                        | .071    |                                             |         |
|                     | Occipital lobe            | 2.80                                        | .094    |                                             |         |
|                     | Parietal lobe             | 7.53                                        | .006    | 17.15                                       | <.001   |
|                     | Temporal lobe             | 17.30                                       | <.001   |                                             |         |
| Age                 | 0.30                      | .586                                        |         |                                             |         |
| Modulation –<br>ROI | Amygdala                  | 48.66                                       | <.001   | 5.84                                        | .002    |
|                     | Posterior cingulate gyrus | 2.19                                        | .139    |                                             |         |
|                     | Precuneus                 | 4.19                                        | .041    | 7.98                                        | .005    |
|                     | Hippocampus               | 83.23                                       | <.001   |                                             |         |
|                     | Parahippocampus           | 21.85                                       | <.001   |                                             |         |
|                     | Frontal lobe              | 5.28                                        | .022    |                                             |         |
|                     | Occipital lobe            | 0.10                                        | .758    |                                             |         |
|                     | Parietal lobe             | 7.93                                        | .005    | 41.85                                       | <.001   |
|                     | Temporal lobe             | 16.95                                       | <.001   |                                             |         |
| Age                 | 0.30                      | .586                                        |         |                                             |         |

<sup>a</sup> Likelihood ratio  $\chi^2$  test statistic and *P* values were determined by univariate and multivariate logistic regression analyses.

**On-line Table 3E: Results of univariate and multivariate analyses for the discrimination of AD from HS in test 3 when the smoothing kernel was set to 12 mm<sup>a</sup>**

|                     |                           | Univariate Analysis                         |         | Multivariate Analysis                       |         |       |       |
|---------------------|---------------------------|---------------------------------------------|---------|---------------------------------------------|---------|-------|-------|
|                     |                           | Likelihood Ratio<br>$\chi^2$ Test Statistic | P Value | Likelihood Ratio<br>$\chi^2$ Test Statistic | P Value |       |       |
| Modulation +<br>ROI | Amygdala                  | 67.31                                       | <.001   | 84.24                                       | <.001   |       |       |
|                     | Posterior cingulate gyrus | 5.76                                        | .016    |                                             |         |       |       |
|                     | Precuneus                 | 1.93                                        | .165    |                                             |         |       |       |
|                     | Hippocampus               | 16.64                                       | <.001   |                                             |         |       |       |
|                     | Parahippocampus           | 17.10                                       | <.001   |                                             |         |       |       |
|                     | Frontal lobe              | 3.98                                        | .046    |                                             |         | 9.57  | .002  |
|                     | Occipital lobe            | 2.93                                        | .087    |                                             |         |       |       |
|                     | Parietal lobe             | 10.24                                       | .001    |                                             |         | 21.64 | <.001 |
|                     | Temporal lobe             | 20.33                                       | <.001   |                                             |         |       |       |
| Age                 | 0.30                      | .586                                        |         |                                             |         |       |       |
| Modulation –<br>ROI | Amygdala                  | 61.24                                       | <.001   | 15.33                                       | <.001   |       |       |
|                     | Posterior cingulate gyrus | 0.15                                        | .700    |                                             |         |       |       |
|                     | Precuneus                 | 2.46                                        | .117    |                                             |         |       |       |
|                     | Hippocampus               | 54.63                                       | <.001   |                                             |         | 8.62  | .003  |
|                     | Parahippocampus           | 10.82                                       | .001    |                                             |         |       |       |
|                     | Frontal lobe              | 7.51                                        | .006    |                                             |         |       |       |
|                     | Occipital lobe            | 0.04                                        | .834    |                                             |         |       |       |
|                     | Parietal lobe             | 8.46                                        | .004    |                                             |         | 7.43  | .006  |
|                     | Temporal lobe             | 21.22                                       | <.001   |                                             |         |       |       |
| Age                 | 0.30                      | .586                                        |         |                                             |         |       |       |

<sup>a</sup> Likelihood ratio  $\chi^2$  test statistic and *P* values were determined by univariate and multivariate logistic regression analyses.

**On-line Table 3F: Results of univariate and multivariate analyses for the discrimination of AD from HS in test 3 when the smoothing kernel was set to 16 mm<sup>a</sup>**

|                     |                           | Univariate Analysis                         |         | Multivariate Analysis                       |         |       |       |
|---------------------|---------------------------|---------------------------------------------|---------|---------------------------------------------|---------|-------|-------|
|                     |                           | Likelihood Ratio<br>$\chi^2$ Test Statistic | P Value | Likelihood Ratio<br>$\chi^2$ Test Statistic | P Value |       |       |
| Modulation +<br>ROI | Amygdala                  | 62.12                                       | <.001   | 75.24                                       | <.001   |       |       |
|                     | Posterior cingulate gyrus | 4.69                                        | .030    |                                             |         |       |       |
|                     | Precuneus                 | 1.60                                        | .206    |                                             |         |       |       |
|                     | Hippocampus               | 15.21                                       | <.001   |                                             |         |       |       |
|                     | Parahippocampus           | 12.10                                       | .001    |                                             |         |       |       |
|                     | Frontal lobe              | 3.74                                        | .053    |                                             |         |       |       |
|                     | Occipital lobe            | 2.43                                        | .119    |                                             |         |       |       |
|                     | Parietal lobe             | 12.16                                       | .001    |                                             |         | 25.28 | <.001 |
|                     | Temporal lobe             | 21.26                                       | <.001   |                                             |         |       |       |
| Age                 | 0.30                      | .586                                        |         |                                             |         |       |       |
| Modulation –<br>ROI | Amygdala                  | 59.52                                       | <.001   | 58.96                                       | <.001   |       |       |
|                     | Posterior cingulate gyrus | 0.02                                        | .891    |                                             |         |       |       |
|                     | Precuneus                 | 2.47                                        | .116    |                                             |         |       |       |
|                     | Hippocampus               | 31.91                                       | <.001   |                                             |         | 8.74  | .003  |
|                     | Parahippocampus           | 5.00                                        | .025    |                                             |         |       |       |
|                     | Frontal lobe              | 9.37                                        | .002    |                                             |         |       |       |
|                     | Occipital lobe            | 0.02                                        | .875    |                                             |         |       |       |
|                     | Parietal lobe             | 9.30                                        | .002    |                                             |         |       |       |
|                     | Temporal lobe             | 23.46                                       | <.001   |                                             |         |       |       |
| Age                 | 0.30                      | .586                                        |         |                                             |         |       |       |

<sup>a</sup> Likelihood ratio  $\chi^2$  test statistic and *P* values were determined by univariate and multivariate logistic regression analyses.

**On-line Table 3G: Results of univariate and multivariate analyses for the discrimination of AD from HS in test 3 when the smoothing kernel was set to 20 mm<sup>a</sup>**

|                     |                           | Univariate Analysis                         |         | Multivariate Analysis                       |         |       |       |
|---------------------|---------------------------|---------------------------------------------|---------|---------------------------------------------|---------|-------|-------|
|                     |                           | Likelihood Ratio<br>$\chi^2$ Test Statistic | P Value | Likelihood Ratio<br>$\chi^2$ Test Statistic | P Value |       |       |
| Modulation +<br>ROI | Amygdala                  | 55.06                                       | <.001   | 68.77                                       | <.001   |       |       |
|                     | Posterior cingulate gyrus | 2.32                                        | .128    |                                             |         |       |       |
|                     | Precuneus                 | 1.33                                        | .249    |                                             |         |       |       |
|                     | Hippocampus               | 14.95                                       | .001    |                                             |         |       |       |
|                     | Parahippocampus           | 9.43                                        | .002    |                                             |         |       |       |
|                     | Frontal lobe              | 3.74                                        | .053    |                                             |         |       |       |
|                     | Occipital lobe            | 2.14                                        | .143    |                                             |         |       |       |
|                     | Parietal lobe             | 12.19                                       | .001    |                                             |         | 26.90 | <.001 |
|                     | Temporal lobe             | 21.47                                       | <.001   |                                             |         |       |       |
| Age                 | 0.30                      | .586                                        |         |                                             |         |       |       |
| Modulation –<br>ROI | Amygdala                  | 53.11                                       | <.001   | 53.44                                       | <.001   |       |       |
|                     | Posterior cingulate gyrus | 0.05                                        | .824    |                                             |         |       |       |
|                     | Precuneus                 | 2.86                                        | .091    |                                             |         |       |       |
|                     | Hippocampus               | 22.31                                       | <.001   |                                             |         |       |       |
|                     | Parahippocampus           | 3.89                                        | .049    |                                             |         |       |       |
|                     | Frontal lobe              | 9.29                                        | .002    |                                             |         |       |       |
|                     | Occipital lobe            | 0.05                                        | .827    |                                             |         |       |       |
|                     | Parietal lobe             | 9.65                                        | .002    |                                             |         | 9.97  | .002  |
|                     | Temporal lobe             | 22.35                                       | <.001   |                                             |         |       |       |
| Age                 | 0.30                      | .586                                        |         |                                             |         |       |       |

<sup>a</sup> Likelihood ratio  $\chi^2$  test statistic and P values determined by univariate and multivariate logistic regression analyses.

**On-line Table 3H: Optimal ROI and diagnostic performance expressed as area under the curve for each image-processing setting in test 3<sup>a</sup>**

| Image-Processing Condition |                            | ROI                       | Likelihood Ratio<br>$\chi^2$ Test Statistic | P Value | AUC   |
|----------------------------|----------------------------|---------------------------|---------------------------------------------|---------|-------|
| Modulation                 | Smoothing Kernel Size (mm) |                           |                                             |         |       |
| +                          | Nonsmoothed                | Amygdala                  | 93.80                                       | <.001   | 0.933 |
|                            |                            | Posterior cingulate gyrus |                                             |         |       |
| +                          | 4                          | Amygdala                  | 96.19                                       | <.001   | 0.957 |
|                            |                            | Posterior cingulate gyrus |                                             |         |       |
|                            |                            | Parietal lobe             |                                             |         |       |
| +                          | 8                          | Amygdala                  | 88.31                                       | <.001   | 0.965 |
|                            |                            | Parietal lobe             |                                             |         |       |
| +                          | 12                         | Amygdala                  | 98.55                                       | <.001   | 0.957 |
|                            |                            | Frontal lobe              |                                             |         |       |
|                            |                            | Parietal lobe             |                                             |         |       |
| +                          | 16                         | Amygdala                  | 68.25                                       | <.001   | 0.930 |
|                            |                            | Parietal lobe             |                                             |         |       |
| +                          | 20                         | Amygdala                  | 81.96                                       | <.001   | 0.918 |
|                            |                            | Parietal lobe             |                                             |         |       |
|                            |                            |                           |                                             |         |       |
| –                          | Nonsmoothed                | Hippocampus               | 120.76                                      | <.001   | 0.869 |
|                            |                            | Precuneus                 |                                             |         |       |
| –                          | 4                          | Hippocampus               | 112.75                                      | <.001   | 0.871 |
|                            |                            | Precuneus                 |                                             |         |       |
|                            |                            | Parahippocampus           |                                             |         |       |
| –                          | 8                          | Amygdala                  | 96.36                                       | <.001   | 0.918 |
|                            |                            | Hippocampus               |                                             |         |       |
|                            |                            | Precuneus                 |                                             |         |       |
| –                          | 12                         | Amygdala                  | 77.32                                       | <.001   | 0.988 |
|                            |                            | Hippocampus               |                                             |         |       |
|                            |                            | Parietal lobe             |                                             |         |       |
| –                          | 16                         | Amygdala                  | 68.25                                       | <.001   | 0.984 |
|                            |                            | Parietal lobe             |                                             |         |       |
| –                          | 20                         | Amygdala                  | 63.08                                       | <.001   | 0.965 |
|                            |                            | Parietal lobe             |                                             |         |       |

<sup>a</sup> Likelihood ratio  $\chi^2$  test statistic and P values were determined by multivariate logistic regression analyses.

**On-line Table 4A: Clinical characteristics of the discovery (optimal setting determination) and validation (diagnostic performance test) groups in test 4**

|                        | Discovery Group |              |                    | Validation Group |             |                    |
|------------------------|-----------------|--------------|--------------------|------------------|-------------|--------------------|
|                        | AD (n = 142)    | HS (n = 142) | P Value            | AD (n = 16)      | HS (n = 16) | P Value            |
| Age (yr)               | 69 ± 8          | 68 ± 8       | .155 <sup>a</sup>  | 69 ± 9           | 68 ± 9      | .800 <sup>a</sup>  |
| Onset age (yr)         | 67 ± 8          | –            |                    | 67 ± 9           | –           |                    |
| Sex (M/F)              | 70:72           | 77:65        | .406 <sup>b</sup>  | 10:6             | 10:6        | 1.000 <sup>b</sup> |
| MMSE                   | 21.7 ± 3.6      | 29.1 ± 0.7   | <.001 <sup>a</sup> | 21.8 ± 3.6       | 28.8 ± 0.7  | <.001 <sup>a</sup> |
| CDR (0.5/1)            | 18/124          | –            |                    | 2/14             | –           |                    |
| Term of education (yr) | 11.7 ± 2.5      | 12.2 ± 2.8   | .095 <sup>c</sup>  | 11.9 ± 3.1       | 12.6 ± 3.7  | .573 <sup>c</sup>  |

<sup>a</sup> ANOVA.

<sup>b</sup>  $\chi^2$  test.

<sup>c</sup> Kruskal-Wallis test.

**On-line Table 4B: Results of univariate and multivariate analyses for the discrimination of AD from HS in test 4 when the smoothing kernel was set to zero millimeters<sup>a</sup>**

|                     |                           | Univariate Analysis                         |         | Multivariate Analysis                       |         |
|---------------------|---------------------------|---------------------------------------------|---------|---------------------------------------------|---------|
|                     |                           | Likelihood Ratio<br>$\chi^2$ Test Statistic | P Value | Likelihood Ratio<br>$\chi^2$ Test Statistic | P Value |
| Modulation +<br>ROI | Amygdala                  | 88.75                                       | <.001   | 94.95                                       | <.001   |
|                     | Posterior cingulate gyrus | 8.46                                        | .004    | 14.66                                       | <.001   |
|                     | Precuneus                 | 2.41                                        | .120    |                                             |         |
|                     | Hippocampus               | 56.76                                       | <.001   |                                             |         |
|                     | Parahippocampus           | 31.23                                       | <.001   |                                             |         |
|                     | Frontal lobe              | 0.13                                        | .715    |                                             |         |
|                     | Occipital lobe            | 3.65                                        | .056    |                                             |         |
|                     | Parietal lobe             | 1.99                                        | .159    |                                             |         |
|                     | Temporal lobe             | 7.65                                        | .006    |                                             |         |
| Age                 |                           | 0.16                                        | .693    |                                             |         |
| Modulation –<br>ROI | Amygdala                  | 24.68                                       | <.001   |                                             |         |
|                     | Posterior cingulate gyrus | 14.40                                       | <.001   |                                             |         |
|                     | Precuneus                 | 5.92                                        | .015    | 12.50                                       | <.001   |
|                     | Hippocampus               | 113.54                                      | <.001   | 120.13                                      | <.001   |
|                     | Parahippocampus           | 37.25                                       | <.001   |                                             |         |
|                     | Frontal lobe              | 0.53                                        | .467    |                                             |         |
|                     | Occipital lobe            | 0.01                                        | .754    |                                             |         |
|                     | Parietal lobe             | 2.98                                        | .084    |                                             |         |
|                     | Temporal lobe             | 6.07                                        | .014    |                                             |         |
| Age                 |                           | 0.16                                        | .693    |                                             |         |

<sup>a</sup> Likelihood ratio  $\chi^2$  test statistic and P values were determined by univariate and multivariate logistic regression analyses.

**On-line Table 4C: Results of univariate and multivariate analyses for the discrimination of AD from HS in test 4 when the smoothing kernel was set to 4 mm<sup>a</sup>**

|                     |                           | Univariate Analysis                         |         | Multivariate Analysis                       |         |
|---------------------|---------------------------|---------------------------------------------|---------|---------------------------------------------|---------|
|                     |                           | Likelihood Ratio<br>$\chi^2$ Test Statistic | P Value | Likelihood Ratio<br>$\chi^2$ Test Statistic | P Value |
| Modulation +<br>ROI | Amygdala                  | 87.65                                       | <.001   | 95.65                                       | <.001   |
|                     | Posterior cingulate gyrus | 6.31                                        | .012    |                                             |         |
|                     | Precuneus                 | 2.04                                        | .154    |                                             |         |
|                     | Hippocampus               | 36.12                                       | <.001   |                                             |         |
|                     | Parahippocampus           | 31.43                                       | <.001   |                                             |         |
|                     | Frontal lobe              | 2.01                                        | .156    |                                             |         |
|                     | Occipital lobe            | 2.37                                        | .124    |                                             |         |
|                     | Parietal lobe             | 4.49                                        | .034    |                                             |         |
|                     | Temporal lobe             | 14.72                                       | <.001   |                                             |         |
| Age                 |                           | 0.16                                        | .693    |                                             |         |
| Modulation –<br>ROI | Amygdala                  | 37.61                                       | <.001   | 6.06                                        | .014    |
|                     | Posterior cingulate gyrus | 5.05                                        | .025    |                                             |         |
|                     | Precuneus                 | 4.83                                        | .028    |                                             |         |
|                     | Hippocampus               | 104.06                                      | <.001   |                                             |         |
|                     | Parahippocampus           | 36.11                                       | <.001   |                                             |         |
|                     | Frontal lobe              | 1.95                                        | .162    |                                             |         |
|                     | Occipital lobe            | <.01                                        | .992    |                                             |         |
|                     | Parietal lobe             | 2.83                                        | .093    |                                             |         |
|                     | Temporal lobe             | 10.98                                       | .001    |                                             |         |
| Age                 |                           | 0.16                                        | .693    |                                             |         |

<sup>a</sup> Likelihood ratio  $\chi^2$  test statistic and *P* values were determined by univariate and multivariate logistic regression analyses.

**On-line Table 4D: Results of univariate and multivariate analyses for the discrimination of AD from HS in test 4 when the smoothing kernel was set to 8 mm<sup>a</sup>**

|                     |                           | Univariate Analysis                         |         | Multivariate Analysis                       |         |
|---------------------|---------------------------|---------------------------------------------|---------|---------------------------------------------|---------|
|                     |                           | Likelihood Ratio<br>$\chi^2$ Test Statistic | P Value | Likelihood Ratio<br>$\chi^2$ Test Statistic | P Value |
| Modulation +<br>ROI | Amygdala                  | 83.64                                       | <.001   | 53.71                                       | <.001   |
|                     | Posterior cingulate gyrus | 4.16                                        | .041    |                                             |         |
|                     | Precuneus                 | 1.39                                        | .239    |                                             |         |
|                     | Hippocampus               | 27.03                                       | <.001   |                                             |         |
|                     | Parahippocampus           | 27.00                                       | <.001   |                                             |         |
|                     | Frontal lobe              | 4.56                                        | .033    |                                             |         |
|                     | Occipital lobe            | 2.77                                        | .096    |                                             |         |
|                     | Parietal lobe             | 5.14                                        | .023    |                                             |         |
|                     | Temporal lobe             | 17.22                                       | <.001   |                                             |         |
| Age                 |                           | 0.16                                        | .693    |                                             |         |
| Modulation –<br>ROI | Amygdala                  | 60.58                                       | <.001   | 8.19                                        | .004    |
|                     | Posterior cingulate gyrus | 1.05                                        | .307    |                                             |         |
|                     | Precuneus                 | 3.48                                        | .062    |                                             |         |
|                     | Hippocampus               | 93.52                                       | <.001   |                                             |         |
|                     | Parahippocampus           | 23.46                                       | <.001   |                                             |         |
|                     | Frontal lobe              | 6.15                                        | .013    |                                             |         |
|                     | Occipital lobe            | <.01                                        | .992    |                                             |         |
|                     | Parietal lobe             | 11.54                                       | .001    |                                             |         |
|                     | Temporal lobe             | 21.39                                       | <.001   |                                             |         |
| Age                 |                           | 0.16                                        | .693    |                                             |         |

<sup>a</sup> Likelihood ratio  $\chi^2$  test statistic and *P* values were determined by univariate and multivariate logistic regression analyses.

**On-line Table 4E: Results of univariate and multivariate analyses for the discrimination of AD from HS in test 4 when the smoothing kernel was set to 12 mm<sup>a</sup>**

|                     |                           | Univariate Analysis                         |         | Multivariate Analysis                       |         |
|---------------------|---------------------------|---------------------------------------------|---------|---------------------------------------------|---------|
|                     |                           | Likelihood Ratio<br>$\chi^2$ Test Statistic | P Value | Likelihood Ratio<br>$\chi^2$ Test Statistic | P Value |
| Modulation +<br>ROI | Amygdala                  | 78.10                                       | <.001   | 94.77                                       | <.001   |
|                     | Posterior cingulate gyrus | 3.34                                        | .068    |                                             |         |
|                     | Precuneus                 | 1.67                                        | .196    |                                             |         |
|                     | Hippocampus               | 22.89                                       | <.001   |                                             |         |
|                     | Parahippocampus           | 20.22                                       | <.001   |                                             |         |
|                     | Frontal lobe              | 5.41                                        | .020    |                                             |         |
|                     | Occipital lobe            | 2.85                                        | .091    |                                             |         |
|                     | Parietal lobe             | 7.55                                        | .006    |                                             |         |
|                     | Temporal lobe             | 20.00                                       | <.001   |                                             |         |
| Age                 | 0.16                      | .693                                        |         |                                             |         |
| Modulation –<br>ROI | Amygdala                  | 76.27                                       | <.001   | 23.45                                       | <.001   |
|                     | Posterior cingulate gyrus | <.01                                        | .984    |                                             |         |
|                     | Precuneus                 | 2.14                                        | .143    |                                             |         |
|                     | Hippocampus               | 63.43                                       | <.001   |                                             |         |
|                     | Parahippocampus           | 13.81                                       | .002    |                                             |         |
|                     | Frontal lobe              | 7.51                                        | .006    |                                             |         |
|                     | Occipital lobe            | <.01                                        | .969    |                                             |         |
|                     | Parietal lobe             | 12.76                                       | <.001   |                                             |         |
|                     | Temporal lobe             | 23.90                                       | <.001   |                                             |         |
| Age                 | 0.16                      | .693                                        |         |                                             |         |

<sup>a</sup> Likelihood ratio  $\chi^2$  test statistic and *P* values were determined by univariate and multivariate logistic regression analyses.

**On-line Table 4F: Results of univariate and multivariate analyses for the discrimination of AD from HS in test 4 when the smoothing kernel was set to 16 mm<sup>a</sup>**

|                     |                           | Univariate Analysis                         |         | Multivariate Analysis                       |         |
|---------------------|---------------------------|---------------------------------------------|---------|---------------------------------------------|---------|
|                     |                           | Likelihood Ratio<br>$\chi^2$ Test Statistic | P Value | Likelihood Ratio<br>$\chi^2$ Test Statistic | P Value |
| Modulation +<br>ROI | Amygdala                  | 71.87                                       | <.001   | 89.52                                       | <.001   |
|                     | Posterior cingulate gyrus | 2.59                                        | .107    |                                             |         |
|                     | Precuneus                 | 1.59                                        | .207    |                                             |         |
|                     | Hippocampus               | 20.49                                       | <.001   |                                             |         |
|                     | Parahippocampus           | 15.66                                       | .001    |                                             |         |
|                     | Frontal lobe              | 5.15                                        | .023    |                                             |         |
|                     | Occipital lobe            | 2.56                                        | .110    |                                             |         |
|                     | Parietal lobe             | 9.61                                        | .002    |                                             |         |
|                     | Temporal lobe             | 20.94                                       | <.001   |                                             |         |
| Age                 | 0.16                      | .693                                        |         |                                             |         |
| Modulation –<br>ROI | Amygdala                  | 74.27                                       | <.001   | 72.77                                       | <.001   |
|                     | Posterior cingulate gyrus | 0.45                                        | .501    |                                             |         |
|                     | Precuneus                 | 2.44                                        | .118    |                                             |         |
|                     | Hippocampus               | 39.90                                       | <.001   |                                             |         |
|                     | Parahippocampus           | 7.35                                        | .007    |                                             |         |
|                     | Frontal lobe              | 8.57                                        | .003    |                                             |         |
|                     | Occipital lobe            | 0.12                                        | .731    |                                             |         |
|                     | Parietal lobe             | 14.50                                       | <.001   |                                             |         |
|                     | Temporal lobe             | 26.02                                       | <.001   |                                             |         |
| Age                 | 0.16                      | .693                                        |         |                                             |         |

<sup>a</sup> Likelihood ratio  $\chi^2$  test statistic and *P* values were determined by univariate and multivariate logistic regression analyses.

**On-line Table 4G: Results of univariate and multivariate analyses for the discrimination of AD from HS in test 4 when the smoothing kernel was set to 20 mm<sup>a</sup>**

|                     |                           | Univariate Analysis                         |         | Multivariate Analysis                       |         |
|---------------------|---------------------------|---------------------------------------------|---------|---------------------------------------------|---------|
|                     |                           | Likelihood Ratio<br>$\chi^2$ Test Statistic | P Value | Likelihood Ratio<br>$\chi^2$ Test Statistic | P Value |
| Modulation +<br>ROI | Amygdala                  | 65.18                                       | <.001   | 66.87                                       | <.001   |
|                     | Posterior cingulate gyrus | 0.90                                        | .343    |                                             |         |
|                     | Precuneus                 | 1.43                                        | .231    |                                             |         |
|                     | Hippocampus               | 20.24                                       | <.001   |                                             |         |
|                     | Parahippocampus           | 13.42                                       | <.001   |                                             |         |
|                     | Frontal lobe              | 4.97                                        | .026    |                                             |         |
|                     | Occipital lobe            | 2.46                                        | .117    |                                             |         |
|                     | Parietal lobe             | 10.06                                       | .002    |                                             |         |
|                     | Temporal lobe             | 21.89                                       | <.001   |                                             |         |
| Age                 | 0.16                      | .693                                        |         |                                             |         |
| Modulation –<br>ROI | Amygdala                  | 66.54                                       | <.001   | 66.86                                       | <.001   |
|                     | Posterior cingulate gyrus | 0.62                                        | .431    |                                             |         |
|                     | Precuneus                 | 2.66                                        | .103    |                                             |         |
|                     | Hippocampus               | 29.40                                       | <.001   |                                             |         |
|                     | Parahippocampus           | 5.83                                        | .016    |                                             |         |
|                     | Frontal lobe              | 7.78                                        | .005    |                                             |         |
|                     | Occipital lobe            | 0.11                                        | .744    |                                             |         |
|                     | Parietal lobe             | 14.13                                       | <.001   |                                             |         |
|                     | Temporal lobe             | 24.64                                       | <.001   |                                             |         |
| Age                 | 0.16                      | .693                                        |         |                                             |         |

<sup>a</sup>Likelihood ratio  $\chi^2$  test statistic and *P* values were determined by univariate and multivariate logistic regression analyses.

**On-line Table 4H: Optimal ROI and diagnostic performance expressed as area under the curve for each image-processing setting in test 4<sup>a</sup>**

| Image-Processing Condition |                            | ROI                       | Likelihood Ratio<br>$\chi^2$ Test Statistic | P Value | AUC   |
|----------------------------|----------------------------|---------------------------|---------------------------------------------|---------|-------|
| Modulation                 | Smoothing Kernel Size (mm) |                           |                                             |         |       |
| +                          | Nonsmoothed                | Amygdala                  | 103.41                                      | <.001   | 0.766 |
|                            |                            | Posterior cingulate gyrus |                                             |         |       |
| +                          | 4                          | Amygdala                  | 100.14                                      | <.001   | 0.855 |
|                            |                            | Parietal lobe             |                                             |         |       |
| +                          | 8                          | Amygdala                  | 107.08                                      | <.001   | 0.871 |
|                            |                            | Frontal lobe              |                                             |         |       |
| +                          | 12                         | Parietal lobe             | 108.09                                      | <.001   | 0.875 |
|                            |                            | Amygdala                  |                                             |         |       |
| +                          | 16                         | Frontal lobe              | 105.05                                      | <.001   | 0.871 |
|                            |                            | Parietal lobe             |                                             |         |       |
| +                          | 20                         | Amygdala                  | 96.92                                       | <.001   | 0.828 |
|                            |                            | Parahippocampus           |                                             |         |       |
| –                          | Nonsmoothed                | Parietal lobe             | 126.04                                      | <.001   | 0.756 |
|                            |                            | Hippocampus               |                                             |         |       |
| –                          | 4                          | Precuneus                 | 117.48                                      | <.001   | 0.781 |
|                            |                            | Amygdala                  |                                             |         |       |
| –                          | 8                          | Hippocampus               | 110.40                                      | <.001   | 0.752 |
|                            |                            | Precuneus                 |                                             |         |       |
| –                          | 12                         | Parietal lobe             | 96.46                                       | <.001   | 0.711 |
|                            |                            | Amygdala                  |                                             |         |       |
| –                          | 16                         | Hippocampus               | 87.27                                       | <.001   | 0.684 |
|                            |                            | Parietal lobe             |                                             |         |       |
| –                          | 20                         | Amygdala                  | 80.99                                       | <.001   | 0.660 |
|                            |                            | Parietal lobe             |                                             |         |       |

<sup>a</sup>Likelihood ratio  $\chi^2$  test statistic and *P* values were determined by multivariate logistic regression analyses.



**On-line Table 5A: Clinical characteristics of the discovery (optimal setting determination) and validation (diagnostic performance test) groups in test 5**

|                        | Discovery Group |              |                    | Validation Group |             |                    |
|------------------------|-----------------|--------------|--------------------|------------------|-------------|--------------------|
|                        | AD (n = 142)    | HS (n = 142) | P Value            | AD (n = 16)      | HS (n = 16) | P Value            |
| Age (yr)               | 69 ± 8          | 68 ± 8       | .458 <sup>a</sup>  | 68 ± 8           | 71 ± 7      | .416 <sup>a</sup>  |
| Onset age (yr)         | 67 ± 8          | –            |                    | 66 ± 8           | –           |                    |
| Sex (M/F)              | 69:73           | 79:63        | .004 <sup>b</sup>  | 11:5             | 8:8         | .027 <sup>b</sup>  |
| MMSE                   | 21.7 ± 3.7      | 29.1 ± 0.7   | <.001 <sup>a</sup> | 22.5 ± 2.9       | 28.9 ± 0.7  | <.00 <sup>a</sup>  |
| CDR (0.5/1)            | 17/125          | –            |                    | 3/13             | –           |                    |
| Term of education (yr) | 11.7 ± 2.5      | 12.3 ± 2.9   | .061 <sup>c</sup>  | 12.2 ± 2.9       | 12.1 ± 3.0  | 1.000 <sup>c</sup> |

<sup>a</sup> ANOVA.

<sup>b</sup>  $\chi^2$  test.

<sup>c</sup> Kruskal-Wallis test.

**On-line Table 5B: Results of univariate and multivariate analyses for the discrimination of AD from HS in test 5 when the smoothing kernel was set to zero millimeters<sup>a</sup>**

|                     |                           | Univariate Analysis                         |         | Multivariate Analysis                       |         |
|---------------------|---------------------------|---------------------------------------------|---------|---------------------------------------------|---------|
|                     |                           | Likelihood Ratio<br>$\chi^2$ Test Statistic | P Value | Likelihood Ratio<br>$\chi^2$ Test Statistic | P Value |
| Modulation +<br>ROI | Amygdala                  | 81.82                                       | <.001   | 88.03                                       | <.001   |
|                     | Posterior cingulate gyrus | 8.45                                        | .004    | 14.66                                       | <.001   |
|                     | Precuneus                 | 1.47                                        | .225    |                                             |         |
|                     | Hippocampus               | 47.75                                       | <.001   |                                             |         |
|                     | Parahippocampus           | 28.22                                       | <.001   |                                             |         |
|                     | Frontal lobe              | 0.01                                        | .897    |                                             |         |
|                     | Occipital lobe            | 3.47                                        | .062    |                                             |         |
|                     | Parietal lobe             | 2.34                                        | .126    |                                             |         |
|                     | Temporal lobe             | 6.66                                        | .001    |                                             |         |
| Age                 |                           | 0.56                                        | .456    |                                             |         |
| Modulation –<br>ROI | Amygdala                  | 22.65                                       | <.001   |                                             |         |
|                     | Posterior cingulate gyrus | 13.10                                       | <.001   |                                             |         |
|                     | Precuneus                 | 5.19                                        | .023    | 12.37                                       | <.001   |
|                     | Hippocampus               | 108.01                                      | <.001   | 115.19                                      | <.001   |
|                     | Parahippocampus           | 34.95                                       | <.001   |                                             |         |
|                     | Frontal lobe              | 0.26                                        | .610    |                                             |         |
|                     | Occipital lobe            | <.01                                        | .982    |                                             |         |
|                     | Parietal lobe             | 1.61                                        | .204    |                                             |         |
|                     | Temporal lobe             | 2.89                                        | .089    |                                             |         |
| Age                 |                           | 0.56                                        | .456    |                                             |         |

<sup>a</sup> Likelihood ratio  $\chi^2$  test statistic and P values were determined by univariate and multivariate logistic regression analyses.

**On-line Table 5C: Results of univariate and multivariate analyses for the discrimination of AD from HS in test 5 when the smoothing kernel was set to 4 mm<sup>a</sup>**

|                     |                           | Univariate Analysis                         |         | Multivariate Analysis                       |         |
|---------------------|---------------------------|---------------------------------------------|---------|---------------------------------------------|---------|
|                     |                           | Likelihood Ratio<br>$\chi^2$ Test Statistic | P Value | Likelihood Ratio<br>$\chi^2$ Test Statistic | P Value |
| Modulation +<br>ROI | Amygdala                  | 81.67                                       | <.001   | 90.47                                       | <.001   |
|                     | Posterior cingulate gyrus | 6.25                                        | .012    |                                             |         |
|                     | Precuneus                 | 1.04                                        | .307    |                                             |         |
|                     | Hippocampus               | 29.13                                       | <.001   |                                             |         |
|                     | Parahippocampus           | 28.85                                       | <.001   |                                             |         |
|                     | Frontal lobe              | 1.85                                        | .174    |                                             |         |
|                     | Occipital lobe            | 1.71                                        | .191    |                                             |         |
|                     | Parietal lobe             | 6.74                                        | .009    |                                             |         |
|                     | Temporal lobe             | 15.01                                       | <.001   |                                             |         |
| Age                 | 0.56                      | .456                                        | 15.54   | <.001                                       |         |
| Modulation –<br>ROI | Amygdala                  | 37.84                                       | <.001   | 9.86                                        | .002    |
|                     | Posterior cingulate gyrus | 13.10                                       | <.001   |                                             |         |
|                     | Precuneus                 | 4.63                                        | .031    |                                             |         |
|                     | Hippocampus               | 108.01                                      | <.001   |                                             |         |
|                     | Parahippocampus           | 34.95                                       | <.001   |                                             |         |
|                     | Frontal lobe              | 2.55                                        | .111    |                                             |         |
|                     | Occipital lobe            | 0.59                                        | .441    |                                             |         |
|                     | Parietal lobe             | 2.22                                        | .136    |                                             |         |
|                     | Temporal lobe             | 10.44                                       | .001    |                                             |         |
| Age                 | 0.56                      | .456                                        | 8.60    | .003                                        |         |

<sup>a</sup> Likelihood ratio  $\chi^2$  test statistic and *P* values were determined by univariate and multivariate logistic regression analyses.

**On-line Table 5D: Results of univariate and multivariate analyses for the discrimination of AD from HS in test 5 when the smoothing kernel was set to 8 mm<sup>a</sup>**

|                     |                           | Univariate Analysis                         |         | Multivariate Analysis                       |         |
|---------------------|---------------------------|---------------------------------------------|---------|---------------------------------------------|---------|
|                     |                           | Likelihood Ratio<br>$\chi^2$ Test Statistic | P Value | Likelihood Ratio<br>$\chi^2$ Test Statistic | P Value |
| Modulation +<br>ROI | Amygdala                  | 78.73                                       | <.001   | 93.02                                       | <.001   |
|                     | Posterior cingulate gyrus | 4.27                                        | .039    |                                             |         |
|                     | Precuneus                 | 0.34                                        | .561    |                                             |         |
|                     | Hippocampus               | 21.46                                       | <.001   |                                             |         |
|                     | Parahippocampus           | 23.18                                       | <.001   |                                             |         |
|                     | Frontal lobe              | 4.79                                        | .028    |                                             |         |
|                     | Occipital lobe            | 2.05                                        | .152    |                                             |         |
|                     | Parietal lobe             | 6.66                                        | .010    |                                             |         |
|                     | Temporal lobe             | 18.78                                       | <.001   |                                             |         |
| Age                 | 0.56                      | .456                                        | 8.48    | .004                                        |         |
| Modulation –<br>ROI | Amygdala                  | 55.80                                       | <.001   | 8.85                                        | .003    |
|                     | Posterior cingulate gyrus | 0.38                                        | .540    |                                             |         |
|                     | Precuneus                 | 2.01                                        | .156    |                                             |         |
|                     | Hippocampus               | 83.73                                       | <.001   |                                             |         |
|                     | Parahippocampus           | 22.37                                       | <.001   |                                             |         |
|                     | Frontal lobe              | 6.67                                        | .009    |                                             |         |
|                     | Occipital lobe            | 0.02                                        | .884    |                                             |         |
|                     | Parietal lobe             | 9.04                                        | .003    |                                             |         |
|                     | Temporal lobe             | 18.81                                       | <.001   |                                             |         |
| Age                 | 0.56                      | .456                                        | 7.31    | .007                                        |         |

<sup>a</sup> Likelihood ratio  $\chi^2$  test statistic and *P* values were determined by univariate and multivariate logistic regression analyses.

**On-line Table 5E: Results of univariate and multivariate analyses for the discrimination of AD from HS in test 5 when the smoothing kernel was set to 12 mm<sup>a</sup>**

|                     |                           | Univariate Analysis                         |         | Multivariate Analysis                       |         |       |       |
|---------------------|---------------------------|---------------------------------------------|---------|---------------------------------------------|---------|-------|-------|
|                     |                           | Likelihood Ratio<br>$\chi^2$ Test Statistic | P Value | Likelihood Ratio<br>$\chi^2$ Test Statistic | P Value |       |       |
| Modulation +<br>ROI | Amygdala                  | 73.82                                       | <.001   | 92.28                                       | <.001   |       |       |
|                     | Posterior cingulate gyrus | 3.06                                        | .080    |                                             |         |       |       |
|                     | Precuneus                 | 0.443                                       | .506    |                                             |         |       |       |
|                     | Hippocampus               | 17.63                                       | <.001   |                                             |         |       |       |
|                     | Parahippocampus           | 15.96                                       | <.001   |                                             |         |       |       |
|                     | Frontal lobe              | 5.81                                        | .016    |                                             |         | 10.44 | .001  |
|                     | Occipital lobe            | 2.00                                        | .158    |                                             |         |       |       |
|                     | Parietal lobe             | 9.07                                        | .003    |                                             |         | 23.86 | <.001 |
|                     | Temporal lobe             | 21.82                                       | <.001   |                                             |         |       |       |
| Age                 | 0.56                      | .456                                        |         |                                             |         |       |       |
| Modulation –<br>ROI | Amygdala                  | 69.18                                       | <.001   | 21.86                                       | <.001   |       |       |
|                     | Posterior cingulate gyrus | 0.19                                        | .662    |                                             |         | 7.52  | .006  |
|                     | Precuneus                 | 0.70                                        | .404    |                                             |         |       |       |
|                     | Hippocampus               | 56.26                                       | .001    |                                             |         |       |       |
|                     | Parahippocampus           | 11.97                                       | .001    |                                             |         |       |       |
|                     | Frontal lobe              | 8.76                                        | .003    |                                             |         |       |       |
|                     | Occipital lobe            | <.01                                        | .997    |                                             |         |       |       |
|                     | Parietal lobe             | 9.55                                        | .002    |                                             |         | 9.03  | .003  |
|                     | Temporal lobe             | 21.75                                       | <.001   |                                             |         |       |       |
| Age                 | 0.56                      | .456                                        |         |                                             |         |       |       |

<sup>a</sup> Likelihood ratio  $\chi^2$  test statistic and *P* values were determined by univariate and multivariate logistic regression analyses.

**On-line Table 5F: Results of univariate and multivariate analyses for the discrimination of AD from HS in test 5 when the smoothing kernel was set to 16 mm<sup>a</sup>**

|                     |                           | Univariate Analysis                         |         | Multivariate Analysis                       |         |       |       |
|---------------------|---------------------------|---------------------------------------------|---------|---------------------------------------------|---------|-------|-------|
|                     |                           | Likelihood Ratio<br>$\chi^2$ Test Statistic | P Value | Likelihood Ratio<br>$\chi^2$ Test Statistic | P Value |       |       |
| Modulation +<br>ROI | Amygdala                  | 67.35                                       | <.001   | 86.92                                       | <.001   |       |       |
|                     | Posterior cingulate gyrus | 2.03                                        | .154    |                                             |         |       |       |
|                     | Precuneus                 | 0.46                                        | .498    |                                             |         |       |       |
|                     | Hippocampus               | 15.10                                       | <.001   |                                             |         |       |       |
|                     | Parahippocampus           | 11.00                                       | .001    |                                             |         |       |       |
|                     | Frontal lobe              | 5.58                                        | .018    |                                             |         | 8.98  | .003  |
|                     | Occipital lobe            | 1.39                                        | .238    |                                             |         |       |       |
|                     | Parietal lobe             | 11.52                                       | .001    |                                             |         | 26.52 | <.001 |
|                     | Temporal lobe             | 23.29                                       | <.001   |                                             |         |       |       |
| Age                 | 0.56                      | .456                                        |         |                                             |         |       |       |
| Modulation –<br>ROI | Amygdala                  | 67.10                                       | <.001   | 67.35                                       | <.001   |       |       |
|                     | Posterior cingulate gyrus | 2.03                                        | .154    |                                             |         |       |       |
|                     | Precuneus                 | 2.01                                        | .156    |                                             |         |       |       |
|                     | Hippocampus               | 34.52                                       | <.001   |                                             |         |       |       |
|                     | Parahippocampus           | 5.54                                        | .019    |                                             |         |       |       |
|                     | Frontal lobe              | 10.83                                       | .001    |                                             |         |       |       |
|                     | Occipital lobe            | 0.03                                        | .853    |                                             |         |       |       |
|                     | Parietal lobe             | 10.63                                       | .001    |                                             |         | 10.88 | .001  |
|                     | Temporal lobe             | 25.21                                       | <.001   |                                             |         |       |       |
| Age                 | 0.56                      | .456                                        |         |                                             |         |       |       |

<sup>a</sup> Likelihood ratio  $\chi^2$  test statistic and *P* values were determined by univariate and multivariate logistic regression analyses.

**On-line Table 5G: Results of univariate and multivariate analyses for the discrimination of AD from HS in test 5 when the smoothing kernel was set to 20 mm<sup>a</sup>**

|                     |                           | Univariate Analysis                         |         | Multivariate Analysis                       |         |       |       |
|---------------------|---------------------------|---------------------------------------------|---------|---------------------------------------------|---------|-------|-------|
|                     |                           | Likelihood Ratio<br>$\chi^2$ Test Statistic | P Value | Likelihood Ratio<br>$\chi^2$ Test Statistic | P Value |       |       |
| Modulation +<br>ROI | Amygdala                  | 60.25                                       | <.001   | 69.29                                       | <.001   |       |       |
|                     | Posterior cingulate gyrus | 0.56                                        | .453    |                                             |         |       |       |
|                     | Precuneus                 | 0.57                                        | .452    |                                             |         |       |       |
|                     | Hippocampus               | 14.54                                       | <.001   |                                             |         |       |       |
|                     | Parahippocampus           | 8.65                                        | .003    |                                             |         | 7.27  | .007  |
|                     | Frontal lobe              | 5.18                                        | .023    |                                             |         |       |       |
|                     | Occipital lobe            | 0.72                                        | .397    |                                             |         |       |       |
|                     | Parietal lobe             | 12.62                                       | <.001   |                                             |         | 25.90 | <.001 |
| Temporal lobe       | 25.77                     | <.001                                       |         |                                             |         |       |       |
| Age                 |                           | 0.56                                        | .456    |                                             |         |       |       |
| Modulation –<br>ROI | Amygdala                  | 59.19                                       | <.001   | 60.70                                       | <.001   |       |       |
|                     | Posterior cingulate gyrus | 0.90                                        | .342    |                                             |         |       |       |
|                     | Precuneus                 | 0.80                                        | .371    |                                             |         |       |       |
|                     | Hippocampus               | 23.35                                       | <.001   |                                             |         |       |       |
|                     | Parahippocampus           | 3.33                                        | .068    |                                             |         |       |       |
|                     | Frontal lobe              | 9.22                                        | .002    |                                             |         |       |       |
|                     | Occipital lobe            | <.01                                        | .973    |                                             |         |       |       |
|                     | Parietal lobe             | 10.89                                       | .001    |                                             |         | 12.40 | <.001 |
| Temporal lobe       | 23.73                     | <.001                                       |         |                                             |         |       |       |
| Age                 |                           | 0.56                                        | .456    |                                             |         |       |       |

<sup>a</sup>Likelihood ratio  $\chi^2$  test statistic and P values were determined by univariate and multivariate logistic regression analyses.

**On-line Table 5H: Optimal ROI and diagnostic performance expressed as area under the curve for each image-processing setting in test 5<sup>a</sup>**

| Image-Processing Condition |                            | ROI                       | Likelihood Ratio<br>$\chi^2$ Test Statistic | P Value | AUC   |
|----------------------------|----------------------------|---------------------------|---------------------------------------------|---------|-------|
| Modulation                 | Smoothing Kernel Size (mm) |                           |                                             |         |       |
| +                          | Nonsmoothed                | Amygdala                  | 96.48                                       | <.001   | 0.895 |
|                            |                            | Posterior cingulate gyrus |                                             |         |       |
| +                          | 4                          | Amygdala                  | 97.20                                       | <.001   | 0.857 |
|                            |                            | Parietal lobe             |                                             |         |       |
| +                          | 8                          | Amygdala                  | 105.18                                      | <.001   | 0.887 |
|                            |                            | Frontal lobe              |                                             |         |       |
| +                          | 12                         | Parietal lobe             | 107.52                                      | <.001   | 0.875 |
|                            |                            | Amygdala                  |                                             |         |       |
| +                          | 16                         | Frontal lobe              | 103.76                                      | <.001   | 0.871 |
|                            |                            | Parietal lobe             |                                             |         |       |
| +                          | 20                         | Amygdala                  | 97.09                                       | <.001   | 0.813 |
|                            |                            | Parahippocampus           |                                             |         |       |
| –                          | Nonsmoothed                | Parietal lobe             | 120.38                                      | <.001   | 0.852 |
|                            |                            | Hippocampus               |                                             |         |       |
| –                          | 4                          | Precuneus                 | 123.10                                      | <.001   | 0.871 |
|                            |                            | Hippocampus               |                                             |         |       |
| –                          | 8                          | Parahippocampus           | 99.43                                       | <.001   | 0.859 |
|                            |                            | Amygdala                  |                                             |         |       |
| –                          | 12                         | Hippocampus               | 78.71                                       | <.001   | 0.828 |
|                            |                            | Parietal lobe             |                                             |         |       |
| –                          | 16                         | Amygdala                  | 77.99                                       | <.001   | 0.840 |
|                            |                            | Posterior cingulate gyrus |                                             |         |       |
| –                          | 20                         | Parietal lobe             | 71.59                                       | <.001   | 0.813 |
|                            |                            | Amygdala                  |                                             |         |       |
|                            |                            | Parietal lobe             |                                             |         |       |

<sup>a</sup>Likelihood ratio  $\chi^2$  test statistic and P values were determined by multivariate logistic regression analyses.

**On-line Table 6A: Clinical characteristics of the discovery (optimal setting determination) and validation (diagnostic performance test) groups in test 6**

|                        | Discovery Group |              |                    | Validation Group |             |                    |
|------------------------|-----------------|--------------|--------------------|------------------|-------------|--------------------|
|                        | AD (n = 142)    | HS (n = 142) | P Value            | AD (n = 16)      | HS (n = 16) | P Value            |
| Age                    | 68 ± 8          | 68 ± 8       | .754 <sup>a</sup>  | 69 ± 7           | 68 ± 8      | .607 <sup>a</sup>  |
| Onset age (yr)         | 67 ± 8          | –            |                    | 68 ± 8           | –           |                    |
| Sex (M/F)              | 76:66           | 79:63        | .721 <sup>b</sup>  | 4:12             | 8:8         | .051 <sup>b</sup>  |
| MMSE                   | 21.8 ± 3.7      | 29.1 ± 0.7   | <.001 <sup>a</sup> | 20.9 ± 2.5       | 29.3 ± 0.7  | <.001 <sup>a</sup> |
| CDR (0.5/1)            | 17/125          | –            |                    | 3/13             | –           |                    |
| Term of education (yr) | 11.8 ± 2.6      | 12.4 ± 2.9   | .068 <sup>c</sup>  | 11.4 ± 2.6       | 11.5 ± 3.2  | .904 <sup>c</sup>  |

<sup>a</sup> ANOVA.

<sup>b</sup>  $\chi^2$  test.

<sup>c</sup> Kruskal-Wallis test.

**On-line Table 6B: Results of univariate and multivariate analyses for the discrimination of AD from HS in test 6 when the smoothing kernel was set to zero millimeters<sup>a</sup>**

|                     |                           | Univariate Analysis                         |         | Multivariate Analysis                       |         |
|---------------------|---------------------------|---------------------------------------------|---------|---------------------------------------------|---------|
|                     |                           | Likelihood Ratio<br>$\chi^2$ Test Statistic | P Value | Likelihood Ratio<br>$\chi^2$ Test Statistic | P Value |
| Modulation +<br>ROI | Amygdala                  | 87.39                                       | <.001   | 93.32                                       | <.001   |
|                     | Posterior cingulate gyrus | 9.97                                        | .002    | 15.90                                       | <.001   |
|                     | Precuneus                 | 2.59                                        | .107    |                                             |         |
|                     | Hippocampus               | 49.11                                       | <.001   |                                             |         |
|                     | Parahippocampus           | 29.60                                       | <.001   |                                             |         |
|                     | Frontal lobe              | 0.70                                        | .404    |                                             |         |
|                     | Occipital lobe            | 4.58                                        | .032    |                                             |         |
|                     | Parietal lobe             | 5.28                                        | .022    |                                             |         |
|                     | Temporal lobe             | 10.46                                       | .001    |                                             |         |
| Age                 |                           | 0.01                                        | .754    |                                             |         |
| Modulation –<br>ROI | Amygdala                  | 20.84                                       | <.001   |                                             |         |
|                     | Posterior cingulate gyrus | 17.61                                       | <.001   |                                             |         |
|                     | Precuneus                 | 7.67                                        | .006    | 13.79                                       | <.001   |
|                     | Hippocampus               | 103.63                                      | <.001   | 109.77                                      | <.001   |
|                     | Parahippocampus           | 33.70                                       | <.001   |                                             |         |
|                     | Frontal lobe              | 2.30                                        | .129    |                                             |         |
|                     | Occipital lobe            | 0.16                                        | .692    |                                             |         |
|                     | Parietal lobe             | 4.72                                        | .030    |                                             |         |
|                     | Temporal lobe             | 6.65                                        | .010    |                                             |         |
| Age                 |                           | 0.01                                        | .754    |                                             |         |

<sup>a</sup> Likelihood ratio  $\chi^2$  test statistic and P values were determined by univariate and multivariate logistic regression analyses.

**On-line Table 6C: Results of univariate and multivariate analyses for the discrimination of AD from HS in test 6 when the smoothing kernel was set to 4 mm<sup>a</sup>**

|                     |                           | Univariate Analysis                         |         | Multivariate Analysis                       |         |
|---------------------|---------------------------|---------------------------------------------|---------|---------------------------------------------|---------|
|                     |                           | Likelihood Ratio<br>$\chi^2$ Test Statistic | P Value | Likelihood Ratio<br>$\chi^2$ Test Statistic | P Value |
| Modulation +<br>ROI | Amygdala                  | 88.15                                       | <.001   | 97.54                                       | <.001   |
|                     | Posterior cingulate gyrus | 7.00                                        | .008    |                                             |         |
|                     | Precuneus                 | 2.43                                        | .119    |                                             |         |
|                     | Hippocampus               | 31.72                                       | <.001   |                                             |         |
|                     | Parahippocampus           | 30.42                                       | <.001   |                                             |         |
|                     | Frontal lobe              | 2.87                                        | .090    |                                             |         |
|                     | Occipital lobe            | 2.90                                        | .089    |                                             |         |
|                     | Parietal lobe             | 10.91                                       | .001    |                                             |         |
|                     | Temporal lobe             | 19.41                                       | <.001   |                                             |         |
| Age                 | 0.01                      | .754                                        | 20.30   | <.001                                       |         |
| Modulation –<br>ROI | Amygdala                  | 36.47                                       |         |                                             | <.001   |
|                     | Posterior cingulate gyrus | 6.26                                        |         |                                             | .012    |
|                     | Precuneus                 | 6.63                                        |         |                                             | .010    |
|                     | Hippocampus               | 97.71                                       |         |                                             | <.001   |
|                     | Parahippocampus           | 36.41                                       |         |                                             | <.001   |
|                     | Frontal lobe              | 6.93                                        |         |                                             | .009    |
|                     | Occipital lobe            | 0.10                                        |         |                                             | .751    |
|                     | Parietal lobe             | 5.48                                        |         |                                             | .019    |
|                     | Temporal lobe             | 14.83                                       | <.001   |                                             |         |
| Age                 | 0.01                      | .754                                        |         |                                             |         |

<sup>a</sup> Likelihood ratio  $\chi^2$  test statistic and *P* values were determined by univariate and multivariate logistic regression analyses.

**On-line Table 6D: Results of univariate and multivariate analyses for the discrimination of AD from HS in test 6 when the smoothing kernel was set to 8 mm<sup>a</sup>**

|                     |                           | Univariate Analysis                         |         | Multivariate Analysis                       |         |
|---------------------|---------------------------|---------------------------------------------|---------|---------------------------------------------|---------|
|                     |                           | Likelihood Ratio<br>$\chi^2$ Test Statistic | P Value | Likelihood Ratio<br>$\chi^2$ Test Statistic | P Value |
| Modulation +<br>ROI | Amygdala                  | 85.69                                       | <.001   | 101.80                                      | <.001   |
|                     | Posterior cingulate gyrus | 3.87                                        | .049    |                                             |         |
|                     | Precuneus                 | 1.60                                        | .206    |                                             |         |
|                     | Hippocampus               | 23.99                                       | <.001   |                                             |         |
|                     | Parahippocampus           | 25.19                                       | <.001   |                                             |         |
|                     | Frontal lobe              | 5.65                                        | .017    |                                             |         |
|                     | Occipital lobe            | 3.57                                        | .059    |                                             |         |
|                     | Parietal lobe             | 10.67                                       | .001    |                                             |         |
|                     | Temporal lobe             | 22.16                                       | <.001   |                                             |         |
| Age                 | 0.01                      | .754                                        | 11.05   | .001                                        |         |
| Modulation –<br>ROI | Amygdala                  | 59.38                                       |         |                                             | <.001   |
|                     | Posterior cingulate gyrus | 1.14                                        |         |                                             | .286    |
|                     | Precuneus                 | 4.57                                        |         |                                             | .033    |
|                     | Hippocampus               | 87.46                                       |         |                                             | <.001   |
|                     | Parahippocampus           | 23.41                                       |         |                                             | <.001   |
|                     | Frontal lobe              | 12.23                                       |         |                                             | .001    |
|                     | Occipital lobe            | 0.05                                        |         |                                             | .828    |
|                     | Parietal lobe             | 15.44                                       |         |                                             | <.001   |
|                     | Temporal lobe             | 28.16                                       | <.001   |                                             |         |
| Age                 | 0.01                      | .754                                        | 23.10   | <.001                                       |         |

<sup>a</sup> Likelihood ratio  $\chi^2$  test statistic and *P* values were determined by univariate and multivariate logistic regression analyses.

**On-line Table 6E: Results of univariate and multivariate analyses for the discrimination of AD from HS in test 6 when the smoothing kernel was set to 12 mm<sup>a</sup>**

|                     |                           | Univariate Analysis                         |         | Multivariate Analysis                       |         |       |       |
|---------------------|---------------------------|---------------------------------------------|---------|---------------------------------------------|---------|-------|-------|
|                     |                           | Likelihood Ratio<br>$\chi^2$ Test Statistic | P Value | Likelihood Ratio<br>$\chi^2$ Test Statistic | P Value |       |       |
| Modulation +<br>ROI | Amygdala                  | 79.66                                       | <.001   | 99.04                                       | <.001   |       |       |
|                     | Posterior cingulate gyrus | 2.61                                        | .106    |                                             |         |       |       |
|                     | Precuneus                 | 1.78                                        | .182    |                                             |         |       |       |
|                     | Hippocampus               | 19.95                                       | <.001   |                                             |         |       |       |
|                     | Parahippocampus           | 18.19                                       | <.001   |                                             |         |       |       |
|                     | Frontal lobe              | 6.27                                        | .012    |                                             |         | 11.71 | .001  |
|                     | Occipital lobe            | 3.79                                        | .052    |                                             |         |       |       |
|                     | Parietal lobe             | 13.04                                       | <.001   |                                             |         | 26.83 | <.001 |
|                     | Temporal lobe             | 24.53                                       | <.001   |                                             |         |       |       |
| Age                 | 0.01                      | .754                                        |         |                                             |         |       |       |
| Modulation –<br>ROI | Amygdala                  | 72.77                                       | <.001   | 23.72                                       | <.001   |       |       |
|                     | Posterior cingulate gyrus | 0.02                                        | .897    | 6.19                                        | .013    |       |       |
|                     | Precuneus                 | 2.83                                        | .093    |                                             |         |       |       |
|                     | Hippocampus               | 57.43                                       | <.001   |                                             |         |       |       |
|                     | Parahippocampus           | 11.84                                       | .001    |                                             |         |       |       |
|                     | Frontal lobe              | 13.86                                       | <.001   |                                             |         |       |       |
|                     | Occipital lobe            | <.01                                        | .923    |                                             |         |       |       |
|                     | Parietal lobe             | 16.13                                       | <.001   | 15.55                                       | <.001   |       |       |
|                     | Temporal lobe             | 32.19                                       | <.001   |                                             |         |       |       |
| Age                 | 0.01                      | .754                                        |         |                                             |         |       |       |

<sup>a</sup> Likelihood ratio  $\chi^2$  test statistic and *P* values were determined by univariate and multivariate logistic regression analyses.

**On-line Table 6F: Results of univariate and multivariate analyses for the discrimination of AD from HS in test 6 when the smoothing kernel was set to 16 mm<sup>a</sup>**

|                     |                           | Univariate Analysis                         |         | Multivariate Analysis                       |         |       |       |
|---------------------|---------------------------|---------------------------------------------|---------|---------------------------------------------|---------|-------|-------|
|                     |                           | Likelihood Ratio<br>$\chi^2$ Test Statistic | P Value | Likelihood Ratio<br>$\chi^2$ Test Statistic | P Value |       |       |
| Modulation +<br>ROI | Amygdala                  | 71.33                                       | <.001   | 91.53                                       | <.001   |       |       |
|                     | Posterior cingulate gyrus | 1.62                                        | .202    |                                             |         |       |       |
|                     | Precuneus                 | 1.59                                        | .221    |                                             |         |       |       |
|                     | Hippocampus               | 17.06                                       | <.001   |                                             |         |       |       |
|                     | Parahippocampus           | 13.28                                       | <.001   |                                             |         |       |       |
|                     | Frontal lobe              | 6.03                                        | .014    |                                             |         | 9.62  | .002  |
|                     | Occipital lobe            | 3.35                                        | .067    |                                             |         |       |       |
|                     | Parietal lobe             | 14.96                                       | <.001   |                                             |         | 28.82 | <.001 |
|                     | Temporal lobe             | 25.96                                       | <.001   |                                             |         |       |       |
| Age                 | 0.01                      | .754                                        |         |                                             |         |       |       |
| Modulation –<br>ROI | Amygdala                  | 68.99                                       | <.001   | 69.19                                       | <.001   |       |       |
|                     | Posterior cingulate gyrus | 0.38                                        | .537    |                                             |         |       |       |
|                     | Precuneus                 | 2.87                                        | .090    |                                             |         |       |       |
|                     | Hippocampus               | 34.34                                       | <.001   |                                             |         |       |       |
|                     | Parahippocampus           | 5.24                                        | .022    |                                             |         |       |       |
|                     | Frontal lobe              | 16.29                                       | <.001   |                                             |         |       |       |
|                     | Occipital lobe            | 0.21                                        | .644    |                                             |         |       |       |
|                     | Parietal lobe             | 17.09                                       | <.001   | 17.29                                       | <.001   |       |       |
|                     | Temporal lobe             | 35.53                                       | <.001   |                                             |         |       |       |
| Age                 | 0.01                      | .754                                        |         |                                             |         |       |       |

<sup>a</sup> Likelihood ratio  $\chi^2$  test statistic and *P* values were determined by univariate and multivariate logistic regression analyses.

**On-line Table 6G: Results of univariate and multivariate analyses for the discrimination of AD from HS in test 6 when the smoothing kernel was set to 20 mm<sup>a</sup>**

|                     |                           | Univariate Analysis                         |         | Multivariate Analysis                       |         |       |       |
|---------------------|---------------------------|---------------------------------------------|---------|---------------------------------------------|---------|-------|-------|
|                     |                           | Likelihood Ratio<br>$\chi^2$ Test Statistic | P Value | Likelihood Ratio<br>$\chi^2$ Test Statistic | P Value |       |       |
| Modulation +<br>ROI | Amygdala                  | 63.22                                       | <.001   | 82.35                                       | <.001   |       |       |
|                     | Posterior cingulate gyrus | 0.47                                        | .494    |                                             |         |       |       |
|                     | Precuneus                 | 1.38                                        | .240    |                                             |         |       |       |
|                     | Hippocampus               | 17.46                                       | <.001   |                                             |         |       |       |
|                     | Parahippocampus           | 12.60                                       | <.001   |                                             |         |       |       |
|                     | Frontal lobe              | 4.90                                        | .027    |                                             |         | 6.19  | .013  |
|                     | Occipital lobe            | 2.42                                        | .120    |                                             |         |       |       |
|                     | Parietal lobe             | 14.72                                       | <.001   |                                             |         |       |       |
|                     | Temporal lobe             | 27.72                                       | <.001   |                                             |         | 29.34 | <.001 |
| Age                 | 0.01                      | .754                                        |         |                                             |         |       |       |
| Modulation –<br>ROI | Amygdala                  | 60.58                                       | <.001   | 63.03                                       | <.001   |       |       |
|                     | Posterior cingulate gyrus | 0.53                                        | .467    |                                             |         |       |       |
|                     | Precuneus                 | 3.39                                        | .065    |                                             |         |       |       |
|                     | Hippocampus               | 23.72                                       | <.001   |                                             |         |       |       |
|                     | Parahippocampus           | 4.10                                        | .043    |                                             |         |       |       |
|                     | Frontal lobe              | 15.99                                       | <.001   |                                             |         |       |       |
|                     | Occipital lobe            | 0.34                                        | .557    |                                             |         |       |       |
|                     | Parietal lobe             | 15.42                                       | <.001   |                                             |         | 17.88 | <.001 |
|                     | Temporal lobe             | 33.33                                       | <.001   |                                             |         |       |       |
| Age                 | 0.01                      | .754                                        |         |                                             |         |       |       |

<sup>a</sup>Likelihood ratio  $\chi^2$  test statistic and *P* values were determined by univariate and multivariate logistic regression analyses.

**On-line Table 6H: Optimal ROI and diagnostic performance expressed as area under the curve for each image-processing setting in test 6<sup>a</sup>**

| Image-Processing Condition |                            | ROI                       | Likelihood Ratio<br>$\chi^2$ Test Statistic | P Value | AUC   |
|----------------------------|----------------------------|---------------------------|---------------------------------------------|---------|-------|
| Modulation                 | Smoothing Kernel Size (mm) |                           |                                             |         |       |
| +                          | Nonsmoothed                | Amygdala                  | 103.30                                      | <.001   | 0.805 |
|                            |                            | Posterior cingulate gyrus |                                             |         |       |
| +                          | 4                          | Amygdala                  | 108.46                                      | <.001   | 0.727 |
|                            |                            | Parietal lobe             |                                             |         |       |
| +                          | 8                          | Amygdala                  | 118.83                                      | <.001   | 0.738 |
|                            |                            | Frontal lobe              |                                             |         |       |
| +                          | 12                         | Parietal lobe             | 118.55                                      | <.001   | 0.711 |
|                            |                            | Amygdala                  |                                             |         |       |
| +                          | 16                         | Frontal lobe              | 111.92                                      | <.001   | 0.719 |
|                            |                            | Parietal lobe             |                                             |         |       |
| +                          | 20                         | Amygdala                  | 101.12                                      | <.001   | 0.758 |
|                            |                            | Frontal lobe              |                                             |         |       |
| –                          | Nonsmoothed                | Parietal lobe             | 117.43                                      | <.001   | 0.938 |
|                            |                            | Hippocampus               |                                             |         |       |
| –                          | 4                          | Precuneus                 | 107.58                                      | <.001   | 0.895 |
|                            |                            | Hippocampus               |                                             |         |       |
| –                          | 8                          | Precuneus                 | 108.41                                      | <.001   | 0.863 |
|                            |                            | Amygdala                  |                                             |         |       |
| –                          | 12                         | Hippocampus               | 89.17                                       | <.001   | 0.777 |
|                            |                            | Parietal lobe             |                                             |         |       |
| –                          | 16                         | Amygdala                  | 86.28                                       | <.001   | 0.785 |
|                            |                            | Posterior cingulate gyrus |                                             |         |       |
| –                          | 20                         | Parietal lobe             | 78.46                                       | <.001   | 0.754 |
|                            |                            | Amygdala                  |                                             |         |       |
|                            |                            | Parietal lobe             |                                             |         |       |

<sup>a</sup>Likelihood ratio  $\chi^2$  test statistic and *P* values were determined by multivariate logistic regression analyses.



**On-line Table 7A: Clinical characteristics of the discovery (optimal setting determination) and validation (diagnostic performance test) groups in test 7**

|                        | Discovery Group |              |                    | Validation Group |             |                    |
|------------------------|-----------------|--------------|--------------------|------------------|-------------|--------------------|
|                        | AD (n = 142)    | HS (n = 142) | P Value            | AD (n = 16)      | HS (n = 16) | P Value            |
| Age (yr)               | 69 ± 8          | 68 ± 7       | .737 <sup>a</sup>  | 69 ± 9           | 68 ± 10     | .698 <sup>a</sup>  |
| Onset age (yr)         | 67 ± 8          | –            |                    | 68 ± 9           | –           |                    |
| Sex (M/F)              | 69:73           | 80:62        | .191 <sup>b</sup>  | 11:5             | 7:9         | .047 <sup>b</sup>  |
| MMSE                   | 21.6 ± 3.6      | 29.1 ± 0.7   | <.001 <sup>a</sup> | 22.8 ± 3.8       | 29.0 ± 0.6  | <.001 <sup>a</sup> |
| CDR (0.5/1)            | 20/122          | –            |                    | 0/16             | –           |                    |
| Term of education (yr) | 11.8 ± 2.6      | 12.4 ± 2.9   | .130 <sup>c</sup>  | 10.6 ± 1.9       | 11.6 ± 2.4  | .229 <sup>c</sup>  |

<sup>a</sup> ANOVA.

<sup>b</sup>  $\chi^2$  test.

<sup>c</sup> Kruskal-Wallis test.

**On-line Table 7B: Results of univariate and multivariate analyses for the discrimination of AD from HS in test 7 when the smoothing kernel was set to zero millimeters<sup>a</sup>**

|                     |                           | Univariate Analysis                         |         | Multivariate Analysis                       |         |
|---------------------|---------------------------|---------------------------------------------|---------|---------------------------------------------|---------|
|                     |                           | Likelihood Ratio<br>$\chi^2$ Test Statistic | P Value | Likelihood Ratio<br>$\chi^2$ Test Statistic | P Value |
| Modulation +<br>ROI | Amygdala                  | 86.48                                       | <.001   | 92.61                                       | <.001   |
|                     | Posterior cingulate gyrus | 12.39                                       | <.001   | 19.52                                       | <.001   |
|                     | Precuneus                 | 4.39                                        | .036    |                                             |         |
|                     | Hippocampus               | 56.46                                       | <.001   |                                             |         |
|                     | Parahippocampus           | 40.95                                       | <.001   |                                             |         |
|                     | Frontal lobe              | 0.80                                        | .370    |                                             |         |
|                     | Occipital lobe            | 2.07                                        | .150    |                                             |         |
|                     | Parietal lobe             | 3.79                                        | .052    |                                             |         |
|                     | Temporal lobe             | 6.67                                        | .001    |                                             |         |
| Age                 |                           | 0.11                                        | .736    |                                             |         |
| Modulation –<br>ROI | Amygdala                  | 19.40                                       | <.001   |                                             |         |
|                     | Posterior cingulate gyrus | 14.32                                       | <.001   |                                             |         |
|                     | Precuneus                 | 9.02                                        | .003    | 14.31                                       | <.001   |
|                     | Hippocampus               | 110.40                                      | <.001   | 115.70                                      | <.001   |
|                     | Parahippocampus           | 37.98                                       | <.001   |                                             |         |
|                     | Frontal lobe              | 1.17                                        | .280    |                                             |         |
|                     | Occipital lobe            | 0.33                                        | .567    |                                             |         |
|                     | Parietal lobe             | 3.34                                        | .068    |                                             |         |
|                     | Temporal lobe             | 4.61                                        | .032    |                                             |         |
| Age                 |                           | 0.11                                        | .736    |                                             |         |

<sup>a</sup> Likelihood ratio  $\chi^2$  test statistic and P values were determined by univariate and multivariate logistic regression analyses.

**On-line Table 7C: Results of univariate and multivariate analyses for the discrimination of AD from HS in test 7 when the smoothing kernel was set to 4 mm<sup>a</sup>**

|                     |                           | Univariate Analysis                         |         | Multivariate Analysis                       |         |
|---------------------|---------------------------|---------------------------------------------|---------|---------------------------------------------|---------|
|                     |                           | Likelihood Ratio<br>$\chi^2$ Test Statistic | P Value | Likelihood Ratio<br>$\chi^2$ Test Statistic | P Value |
| Modulation +<br>ROI | Amygdala                  | 87.38                                       | <.001   | 98.14                                       | <.001   |
|                     | Posterior cingulate gyrus | 10.63                                       | .001    | 7.18                                        | .007    |
|                     | Precuneus                 | 3.78                                        | .052    |                                             |         |
|                     | Hippocampus               | 36.35                                       | <.001   |                                             |         |
|                     | Parahippocampus           | 43.45                                       | <.001   |                                             |         |
|                     | Frontal lobe              | 3.38                                        | .066    |                                             |         |
|                     | Occipital lobe            | 1.36                                        | .244    |                                             |         |
|                     | Parietal lobe             | 7.51                                        | .006    | 6.10                                        | .013    |
|                     | Temporal lobe             | 13.19                                       | <.001   |                                             |         |
| Age                 |                           | 0.11                                        | .736    |                                             |         |
| Modulation –<br>ROI | Amygdala                  | 32.83                                       | <.001   |                                             |         |
|                     | Posterior cingulate gyrus | 5.61                                        | .018    |                                             |         |
|                     | Precuneus                 | 7.31                                        | .007    | 10.54                                       | .001    |
|                     | Hippocampus               | 99.57                                       | <.001   | 66.60                                       | <.001   |
|                     | Parahippocampus           | 40.06                                       | <.001   | 6.42                                        | .011    |
|                     | Frontal lobe              | 3.68                                        | .055    |                                             |         |
|                     | Occipital lobe            | 0.04                                        | .838    |                                             |         |
|                     | Parietal lobe             | 2.58                                        | .108    |                                             |         |
|                     | Temporal lobe             | 11.22                                       | <.001   |                                             |         |
| Age                 |                           | 0.11                                        | .736    |                                             |         |

<sup>a</sup> Likelihood ratio  $\chi^2$  test statistic and *P* values were determined by univariate and multivariate logistic regression analyses.

**On-line Table 7D: Results of univariate and multivariate analyses for the discrimination of AD from HS in test 7 when the smoothing kernel was set to 8 mm<sup>a</sup>**

|                     |                           | Univariate Analysis                         |         | Multivariate Analysis                       |         |
|---------------------|---------------------------|---------------------------------------------|---------|---------------------------------------------|---------|
|                     |                           | Likelihood Ratio<br>$\chi^2$ Test Statistic | P Value | Likelihood Ratio<br>$\chi^2$ Test Statistic | P Value |
| Modulation +<br>ROI | Amygdala                  | 84.96                                       | <.001   | 101.94                                      | <.001   |
|                     | Posterior cingulate gyrus | 8.43                                        | .004    |                                             |         |
|                     | Precuneus                 | 2.49                                        | .115    |                                             |         |
|                     | Hippocampus               | 27.01                                       | <.001   |                                             |         |
|                     | Parahippocampus           | 36.54                                       | <.001   |                                             |         |
|                     | Frontal lobe              | 7.13                                        | .008    | 13.24                                       | <.001   |
|                     | Occipital lobe            | 1.66                                        | .197    |                                             |         |
|                     | Parietal lobe             | 7.31                                        | .007    | 19.99                                       | <.001   |
|                     | Temporal lobe             | 15.52                                       | <.001   |                                             |         |
| Age                 |                           | 0.11                                        | .736    |                                             |         |
| Modulation –<br>ROI | Amygdala                  | 53.69                                       | <.001   |                                             |         |
|                     | Posterior cingulate gyrus | 1.67                                        | .196    |                                             |         |
|                     | Precuneus                 | 4.93                                        | .026    | 7.11                                        | .008    |
|                     | Hippocampus               | 87.88                                       | <.001   | 88.01                                       | <.001   |
|                     | Parahippocampus           | 27.07                                       | <.001   |                                             |         |
|                     | Frontal lobe              | 9.96                                        | .002    | 7.06                                        | .008    |
|                     | Occipital lobe            | 0.22                                        | .640    |                                             |         |
|                     | Parietal lobe             | 10.12                                       | .002    |                                             |         |
|                     | Temporal lobe             | 17.02                                       | <.001   |                                             |         |
| Age                 |                           | 0.11                                        | .736    |                                             |         |

<sup>a</sup> Likelihood ratio  $\chi^2$  test statistic and *P* values were determined by univariate and multivariate logistic regression analyses.

**On-line Table 7E: Results of univariate and multivariate analyses for the discrimination of AD from HS in test 7 when the smoothing kernel was set to 12 mm<sup>a</sup>**

|                     |                           | Univariate Analysis                         |         | Multivariate Analysis                       |         |
|---------------------|---------------------------|---------------------------------------------|---------|---------------------------------------------|---------|
|                     |                           | Likelihood Ratio<br>$\chi^2$ Test Statistic | P Value | Likelihood Ratio<br>$\chi^2$ Test Statistic | P Value |
| Modulation +<br>ROI | Amygdala                  | 80.07                                       | <.001   | 101.47                                      | <.001   |
|                     | Posterior cingulate gyrus | 7.02                                        | .008    |                                             |         |
|                     | Precuneus                 | 2.66                                        | .103    |                                             |         |
|                     | Hippocampus               | 23.59                                       | <.001   |                                             |         |
|                     | Parahippocampus           | 27.77                                       | <.001   |                                             |         |
|                     | Frontal lobe              | 7.84                                        | .005    |                                             |         |
|                     | Occipital lobe            | 1.68                                        | .195    |                                             |         |
|                     | Parietal lobe             | 9.26                                        | .002    |                                             |         |
|                     | Temporal lobe             | 17.97                                       | <.001   |                                             |         |
| Age                 |                           | 0.11                                        | .736    |                                             |         |
| Modulation –<br>ROI | Amygdala                  | 68.01                                       | <.001   | 19.65                                       | <.001   |
|                     | Posterior cingulate gyrus | 0.02                                        | .896    |                                             |         |
|                     | Precuneus                 | 3.27                                        | .071    |                                             |         |
|                     | Hippocampus               | 57.06                                       | <.001   |                                             |         |
|                     | Parahippocampus           | 14.17                                       | <.001   |                                             |         |
|                     | Frontal lobe              | 10.81                                       | .001    |                                             |         |
|                     | Occipital lobe            | 0.194                                       | .660    |                                             |         |
|                     | Parietal lobe             | 10.89                                       | .001    |                                             |         |
|                     | Temporal lobe             | 18.18                                       | <.001   |                                             |         |
| Age                 |                           | 0.11                                        | .736    |                                             |         |

<sup>a</sup> Likelihood ratio  $\chi^2$  test statistic and *P* values were determined by univariate and multivariate logistic regression analyses.

**On-line Table 7F: Results of univariate and multivariate analyses for the discrimination of AD from HS in test 7 when the smoothing kernel was set to 16 mm<sup>a</sup>**

|                     |                           | Univariate Analysis                         |         | Multivariate Analysis                       |         |
|---------------------|---------------------------|---------------------------------------------|---------|---------------------------------------------|---------|
|                     |                           | Likelihood Ratio<br>$\chi^2$ Test Statistic | P Value | Likelihood Ratio<br>$\chi^2$ Test Statistic | P Value |
| Modulation +<br>ROI | Amygdala                  | 73.32                                       | <.001   | 95.83                                       | <.001   |
|                     | Posterior cingulate gyrus | 5.04                                        | .025    |                                             |         |
|                     | Precuneus                 | 2.42                                        | .120    |                                             |         |
|                     | Hippocampus               | 21.87                                       | <.001   |                                             |         |
|                     | Parahippocampus           | 21.72                                       | <.001   |                                             |         |
|                     | Frontal lobe              | 7.84                                        | .005    |                                             |         |
|                     | Occipital lobe            | 1.40                                        | .237    |                                             |         |
|                     | Parietal lobe             | 10.79                                       | .001    |                                             |         |
|                     | Temporal lobe             | 19.29                                       | <.001   |                                             |         |
| Age                 |                           | 0.11                                        | .736    |                                             |         |
| Modulation –<br>ROI | Amygdala                  | 64.76                                       | <.001   | 66.38                                       | <.001   |
|                     | Posterior cingulate gyrus | 0.33                                        | .562    |                                             |         |
|                     | Precuneus                 | 3.52                                        | .061    |                                             |         |
|                     | Hippocampus               | 33.64                                       | <.001   |                                             |         |
|                     | Parahippocampus           | 6.47                                        | .011    |                                             |         |
|                     | Frontal lobe              | 12.73                                       | <.001   |                                             |         |
|                     | Occipital lobe            | 0.73                                        | .393    |                                             |         |
|                     | Parietal lobe             | 12.42                                       | <.001   |                                             |         |
|                     | Temporal lobe             | 20.34                                       | <.001   |                                             |         |
| Age                 |                           | 0.11                                        | .736    |                                             |         |

<sup>a</sup> Likelihood ratio  $\chi^2$  test statistic and *P* values were determined by univariate and multivariate logistic regression analyses.

**On-line Table 7G: Results of univariate and multivariate analyses for the discrimination of AD from HS in test 7 when the smoothing kernel was set to 20 mm<sup>a</sup>**

|                     |                           | Univariate Analysis                         |         | Multivariate Analysis                       |         |       |       |
|---------------------|---------------------------|---------------------------------------------|---------|---------------------------------------------|---------|-------|-------|
|                     |                           | Likelihood Ratio<br>$\chi^2$ Test Statistic | P Value | Likelihood Ratio<br>$\chi^2$ Test Statistic | P Value |       |       |
| Modulation +<br>ROI | Amygdala                  | 65.56                                       | <.001   | 87.74                                       | <.001   |       |       |
|                     | Posterior cingulate gyrus | 2.11                                        | .146    |                                             |         |       |       |
|                     | Precuneus                 | 1.38                                        | .240    |                                             |         |       |       |
|                     | Hippocampus               | 20.42                                       | <.001   |                                             |         |       |       |
|                     | Parahippocampus           | 16.73                                       | <.001   |                                             |         |       |       |
|                     | Frontal lobe              | 8.02                                        | .005    |                                             |         | 11.02 | .001  |
|                     | Occipital lobe            | 2.09                                        | .148    |                                             |         |       |       |
|                     | Parietal lobe             | 11.47                                       | .001    |                                             |         | 26.32 | <.001 |
|                     | Temporal lobe             | 20.79                                       | <.001   |                                             |         |       |       |
| Age                 |                           | 0.11                                        | .736    |                                             |         |       |       |
| Modulation –<br>ROI | Amygdala                  | 55.64                                       | <.001   | 59.19                                       | <.001   |       |       |
|                     | Posterior cingulate gyrus | 0.44                                        | .506    |                                             |         |       |       |
|                     | Precuneus                 | 4.02                                        | .045    |                                             |         |       |       |
|                     | Hippocampus               | 22.59                                       | <.001   |                                             |         |       |       |
|                     | Parahippocampus           | 4.30                                        | .038    |                                             |         |       |       |
|                     | Frontal lobe              | 11.31                                       | .001    |                                             |         |       |       |
|                     | Occipital lobe            | 0.61                                        | .436    |                                             |         |       |       |
|                     | Parietal lobe             | 11.72                                       | .001    |                                             |         | 15.27 | <.001 |
|                     | Temporal lobe             | 18.86                                       | <.001   |                                             |         |       |       |
| Age                 |                           | 0.11                                        | .736    |                                             |         |       |       |

<sup>a</sup> Likelihood ratio  $\chi^2$  test statistic and *P* values were determined by univariate and multivariate logistic regression analyses.

**On-line Table 7H: Optimal ROI and diagnostic performance expressed as area under the curve for each image-processing setting in test 7<sup>a</sup>**

| Image-Processing Condition |                            | ROI                       | Likelihood Ratio<br>$\chi^2$ Test Statistic | P Value | AUC   |
|----------------------------|----------------------------|---------------------------|---------------------------------------------|---------|-------|
| Modulation                 | Smoothing Kernel Size (mm) |                           |                                             |         |       |
| +                          | Nonsmoothed                | Amygdala                  | 106.00                                      | <.001   | 0.758 |
|                            |                            | Posterior cingulate gyrus |                                             |         |       |
| +                          | 4                          | Amygdala                  | 110.83                                      | <.001   | 0.793 |
|                            |                            | Posterior cingulate gyrus |                                             |         |       |
|                            |                            | Parietal lobe             |                                             |         |       |
| +                          | 8                          | Amygdala                  | 117.06                                      | <.001   | 0.805 |
|                            |                            | Frontal lobe              |                                             |         |       |
|                            |                            | Parietal lobe             |                                             |         |       |
| +                          | 12                         | Amygdala                  | 118.83                                      | <.001   | 0.801 |
|                            |                            | Frontal lobe              |                                             |         |       |
|                            |                            | Parietal lobe             |                                             |         |       |
| +                          | 16                         | Amygdala                  | 113.39                                      | <.001   | 0.816 |
|                            |                            | Frontal lobe              |                                             |         |       |
|                            |                            | Parietal lobe             |                                             |         |       |
| +                          | 20                         | Amygdala                  | 106.08                                      | <.001   | 0.816 |
|                            |                            | Frontal lobe              |                                             |         |       |
|                            |                            | Parietal lobe             |                                             |         |       |
| –                          | Nonsmoothed                | Hippocampus               | 124.73                                      | <.001   | 0.836 |
|                            |                            | Precuneus                 |                                             |         |       |
| –                          | 4                          | Hippocampus               | 115.60                                      | <.001   | 0.852 |
|                            |                            | Precuneus                 |                                             |         |       |
|                            |                            | Parahippocampus           |                                             |         |       |
| –                          | 8                          | Hippocampus               | 102.13                                      | <.001   | 0.809 |
|                            |                            | Precuneus                 |                                             |         |       |
|                            |                            | Frontal lobe              |                                             |         |       |
| –                          | 12                         | Amygdala                  | 86.80                                       | <.001   | 0.828 |
|                            |                            | Hippocampus               |                                             |         |       |
|                            |                            | Parietal lobe             |                                             |         |       |
| –                          | 16                         | Amygdala                  | 78.80                                       | <.001   | 0.811 |
|                            |                            | Parietal lobe             |                                             |         |       |
|                            |                            | Amygdala                  |                                             |         |       |
| –                          | 20                         | Amygdala                  | 70.91                                       | <.001   | 0.824 |
|                            |                            | Parietal lobe             |                                             |         |       |

<sup>a</sup> Likelihood ratio  $\chi^2$  test statistic and *P* values were determined by multivariate logistic regression analyses.

**On-line Table 8A: Clinical characteristics of the discovery (optimal setting determination) and validation (diagnostic performance test) groups in test 8**

|                        | Discovery Group |              |                    | Validation Group |             |                    |
|------------------------|-----------------|--------------|--------------------|------------------|-------------|--------------------|
|                        | AD (n = 142)    | HS (n = 142) | P Value            | AD (n = 16)      | HS (n = 16) | P Value            |
| Age (yr)               | 69 ± 8          | 68 ± 8       | .669 <sup>a</sup>  | 69 ± 8           | 68 ± 6      | .865 <sup>a</sup>  |
| Onset age (yr)         | 67 ± 8          | –            |                    | 68 ± 9           | –           |                    |
| Sex (M/F)              | 71:71           | 81:61        | .234 <sup>b</sup>  | 9:7              | 6:10        | .286 <sup>b</sup>  |
| MMSE                   | 21.7 ± 3.4      | 29.1 ± 0.7   | <.001 <sup>a</sup> | 21.8 ± 4.8       | 29.3 ± 0.7  | <.001 <sup>a</sup> |
| CDR (0.5/1)            | 19/123          | –            |                    | 1/15             | –           |                    |
| Term of education (yr) | 11.7 ± 2.6      | 12.2 ± 2.9   | .100 <sup>c</sup>  | 12.2 ± 2.6       | 12.8 ± 2.9  | .529 <sup>c</sup>  |

<sup>a</sup> ANOVA.

<sup>b</sup>  $\chi^2$  test.

<sup>c</sup> Kruskal-Wallis test.

**On-line Table 8B: Results of univariate and multivariate analyses for the discrimination of AD from HS in test 8 when the smoothing kernel was set to zero millimeters<sup>a</sup>**

|                     |                           | Univariate Analysis                         |         | Multivariate Analysis                       |         |
|---------------------|---------------------------|---------------------------------------------|---------|---------------------------------------------|---------|
|                     |                           | Likelihood Ratio<br>$\chi^2$ Test Statistic | P Value | Likelihood Ratio<br>$\chi^2$ Test Statistic | P Value |
| Modulation +<br>ROI | Amygdala                  | 79.58                                       | <.001   | 88.66                                       | <.001   |
|                     | Posterior cingulate gyrus | 13.15                                       | <.001   | 22.22                                       | <.001   |
|                     | Precuneus                 | 2.59                                        | .107    |                                             |         |
|                     | Hippocampus               | 52.91                                       | <.001   |                                             |         |
|                     | Parahippocampus           | 32.98                                       | <.001   |                                             |         |
|                     | Frontal lobe              | <.01                                        | .922    |                                             |         |
|                     | Occipital lobe            | 3.81                                        | .051    |                                             |         |
|                     | Parietal lobe             | 2.54                                        | .111    |                                             |         |
|                     | Temporal lobe             | 8.31                                        | .004    |                                             |         |
| Age                 |                           | 0.18                                        | .667    |                                             |         |
| Modulation –<br>ROI | Amygdala                  | 17.36                                       | <.001   |                                             |         |
|                     | Posterior cingulate gyrus | 19.05                                       | <.001   |                                             |         |
|                     | Precuneus                 | 5.46                                        | .019    | 9.98                                        | .002    |
|                     | Hippocampus               | 110.00                                      | <.001   | 114.48                                      | <.001   |
|                     | Parahippocampus           | 37.47                                       | <.001   |                                             |         |
|                     | Frontal lobe              | 0.21                                        | .648    |                                             |         |
|                     | Occipital lobe            | 0.07                                        | .792    |                                             |         |
|                     | Parietal lobe             | 1.75                                        | .186    |                                             |         |
|                     | Temporal lobe             | 4.34                                        | .037    |                                             |         |
| Age                 |                           | 0.18                                        | .667    |                                             |         |

<sup>a</sup> Likelihood ratio  $\chi^2$  test statistic and P values were determined by univariate and multivariate logistic regression analyses.

**On-line Table 8C: Results of univariate and multivariate analyses for the discrimination of AD from HS in test 8 when the smoothing kernel was set to 4 mm<sup>a</sup>**

|                     |                           | Univariate Analysis                         |         | Multivariate Analysis                       |         |
|---------------------|---------------------------|---------------------------------------------|---------|---------------------------------------------|---------|
|                     |                           | Likelihood Ratio<br>$\chi^2$ Test Statistic | P Value | Likelihood Ratio<br>$\chi^2$ Test Statistic | P Value |
| Modulation +<br>ROI | Amygdala                  | 81.95                                       | <.001   | 94.93                                       | <.001   |
|                     | Posterior cingulate gyrus | 9.64                                        | .002    | 6.16                                        | .013    |
|                     | Precuneus                 | 2.24                                        | .135    |                                             |         |
|                     | Hippocampus               | 33.37                                       | <.001   |                                             |         |
|                     | Parahippocampus           | 32.80                                       | <.001   |                                             |         |
|                     | Frontal lobe              | 1.21                                        | .272    |                                             |         |
|                     | Occipital lobe            | 6.67                                        | .001    |                                             |         |
|                     | Parietal lobe             | 7.51                                        | .006    | 7.26                                        | .007    |
|                     | Temporal lobe             | 17.46                                       | <.001   |                                             |         |
| Age                 |                           | 0.18                                        | .667    |                                             |         |
| Modulation –<br>ROI | Amygdala                  | 31.89                                       | <.001   |                                             |         |
|                     | Posterior cingulate gyrus | 7.91                                        | .005    |                                             |         |
|                     | Precuneus                 | 4.29                                        | .038    | 7.23                                        | .007    |
|                     | Hippocampus               | 101.89                                      | <.001   | 72.36                                       | <.001   |
|                     | Parahippocampus           | 39.79                                       | <.001   | 8.78                                        | .003    |
|                     | Frontal lobe              | 1.63                                        | .202    |                                             |         |
|                     | Occipital lobe            | 0.18                                        | .672    |                                             |         |
|                     | Parietal lobe             | 1.85                                        | .174    |                                             |         |
|                     | Temporal lobe             | 11.00                                       | .001    |                                             |         |
| Age                 |                           | 0.18                                        | .667    |                                             |         |

<sup>a</sup> Likelihood ratio  $\chi^2$  test statistic and *P* values were determined by univariate and multivariate logistic regression analyses.

**On-line Table 8D: Results of univariate and multivariate analyses for the discrimination of AD from HS in test 8 when the smoothing kernel was set to 8 mm<sup>a</sup>**

|                     |                           | Univariate Analysis                         |         | Multivariate Analysis                       |         |
|---------------------|---------------------------|---------------------------------------------|---------|---------------------------------------------|---------|
|                     |                           | Likelihood Ratio<br>$\chi^2$ Test Statistic | P Value | Likelihood Ratio<br>$\chi^2$ Test Statistic | P Value |
| Modulation +<br>ROI | Amygdala                  | 81.09                                       | <.001   | 94.62                                       | <.001   |
|                     | Posterior cingulate gyrus | 7.29                                        | .007    |                                             |         |
|                     | Precuneus                 | 2.49                                        | .115    |                                             |         |
|                     | Hippocampus               | 24.91                                       | <.001   |                                             |         |
|                     | Parahippocampus           | 26.86                                       | <.001   |                                             |         |
|                     | Frontal lobe              | 3.80                                        | .051    |                                             |         |
|                     | Occipital lobe            | 2.51                                        | .113    |                                             |         |
|                     | Parietal lobe             | 7.70                                        | .006    | 21.22                                       | <.001   |
|                     | Temporal lobe             | 20.58                                       | <.001   |                                             |         |
| Age                 |                           | 0.18                                        | .667    |                                             |         |
| Modulation –<br>ROI | Amygdala                  | 58.09                                       | <.001   | 8.06                                        | .005    |
|                     | Posterior cingulate gyrus | 1.52                                        | .217    |                                             |         |
|                     | Precuneus                 | 2.65                                        | .104    |                                             |         |
|                     | Hippocampus               | 101.89                                      | <.001   | 38.52                                       | <.001   |
|                     | Parahippocampus           | 25.86                                       | <.001   |                                             |         |
|                     | Frontal lobe              | 6.28                                        | .012    |                                             |         |
|                     | Occipital lobe            | 0.06                                        | .812    |                                             |         |
|                     | Parietal lobe             | 9.94                                        | .002    | 7.44                                        | .006    |
|                     | Temporal lobe             | 21.72                                       | <.001   |                                             |         |
| Age                 |                           | 0.18                                        | .667    |                                             |         |

<sup>a</sup> Likelihood ratio  $\chi^2$  test statistic and *P* values were determined by univariate and multivariate logistic regression analyses.

**On-line Table 8E: Results of univariate and multivariate analyses for the discrimination of AD from HS in test 8 when the smoothing kernel was set to 12 mm<sup>a</sup>**

|                     |                           | Univariate Analysis                         |         | Multivariate Analysis                       |         |       |       |
|---------------------|---------------------------|---------------------------------------------|---------|---------------------------------------------|---------|-------|-------|
|                     |                           | Likelihood Ratio<br>$\chi^2$ Test Statistic | P Value | Likelihood Ratio<br>$\chi^2$ Test Statistic | P Value |       |       |
| Modulation +<br>ROI | Amygdala                  | 75.82                                       | <.001   | 95.37                                       | <.001   |       |       |
|                     | Posterior cingulate gyrus | 5.72                                        | .017    |                                             |         |       |       |
|                     | Precuneus                 | 1.95                                        | .163    |                                             |         |       |       |
|                     | Hippocampus               | 21.72                                       | <.001   |                                             |         |       |       |
|                     | Parahippocampus           | 20.19                                       | <.001   |                                             |         |       |       |
|                     | Frontal lobe              | 4.61                                        | .032    |                                             |         | 7.93  | .005  |
|                     | Occipital lobe            | 2.59                                        | .108    |                                             |         |       |       |
|                     | Parietal lobe             | 10.99                                       | .001    |                                             |         | 26.33 | <.001 |
|                     | Temporal lobe             | 22.60                                       | <.001   |                                             |         |       |       |
| Age                 | 0.18                      | .667                                        |         |                                             |         |       |       |
| Modulation –<br>ROI | Amygdala                  | 73.27                                       | <.001   | 21.46                                       | <.001   |       |       |
|                     | Posterior cingulate gyrus | <.01                                        | .992    |                                             |         |       |       |
|                     | Precuneus                 | 1.55                                        | .212    |                                             |         |       |       |
|                     | Hippocampus               | 60.14                                       | <.001   |                                             |         | 6.94  | .008  |
|                     | Parahippocampus           | 14.91                                       | <.001   |                                             |         |       |       |
|                     | Frontal lobe              | 8.34                                        | .004    |                                             |         |       |       |
|                     | Occipital lobe            | 0.04                                        | .848    |                                             |         |       |       |
|                     | Parietal lobe             | 11.40                                       | .001    |                                             |         | 8.84  | .003  |
|                     | Temporal lobe             | 24.34                                       | <.001   |                                             |         |       |       |
| Age                 | 0.18                      | .667                                        |         |                                             |         |       |       |

<sup>a</sup> Likelihood ratio  $\chi^2$  test statistic and *P* values were determined by univariate and multivariate logistic regression analyses.

**On-line Table 8F: Results of univariate and multivariate analyses for the discrimination of AD from HS in test 8 when the smoothing kernel was set to 16 mm<sup>a</sup>**

|                     |                           | Univariate Analysis                         |         | Multivariate Analysis                       |         |       |       |
|---------------------|---------------------------|---------------------------------------------|---------|---------------------------------------------|---------|-------|-------|
|                     |                           | Likelihood Ratio<br>$\chi^2$ Test Statistic | P Value | Likelihood Ratio<br>$\chi^2$ Test Statistic | P Value |       |       |
| Modulation +<br>ROI | Amygdala                  | 69.50                                       | <.001   | 90.04                                       | <.001   |       |       |
|                     | Posterior cingulate gyrus | 4.12                                        | .043    |                                             |         |       |       |
|                     | Precuneus                 | 1.84                                        | .175    |                                             |         |       |       |
|                     | Hippocampus               | 19.87                                       | <.001   |                                             |         |       |       |
|                     | Parahippocampus           | 15.24                                       | <.001   |                                             |         |       |       |
|                     | Frontal lobe              | 4.52                                        | .034    |                                             |         | 6.76  | <.009 |
|                     | Occipital lobe            | 2.07                                        | .150    |                                             |         |       |       |
|                     | Parietal lobe             | 13.40                                       | <.001   |                                             |         | 28.45 | <.001 |
|                     | Temporal lobe             | 23.15                                       | <.001   |                                             |         |       |       |
| Age                 | 0.18                      | .667                                        |         |                                             |         |       |       |
| Modulation –<br>ROI | Amygdala                  | 70.94                                       | <.001   | 69.17                                       | <.001   |       |       |
|                     | Posterior cingulate gyrus | 0.17                                        | .680    |                                             |         |       |       |
|                     | Precuneus                 | 2.07                                        | .150    |                                             |         |       |       |
|                     | Hippocampus               | 38.59                                       | <.001   |                                             |         |       |       |
|                     | Parahippocampus           | 8.10                                        | .004    |                                             |         |       |       |
|                     | Frontal lobe              | 11.70                                       | .001    |                                             |         |       |       |
|                     | Occipital lobe            | 0.43                                        | .513    |                                             |         |       |       |
|                     | Parietal lobe             | 13.62                                       | <.001   |                                             |         | 11.85 | .001  |
|                     | Temporal lobe             | 28.05                                       | <.001   |                                             |         |       |       |
| Age                 | 0.18                      | .667                                        |         |                                             |         |       |       |

<sup>a</sup> Likelihood ratio  $\chi^2$  test statistic and *P* values were determined by univariate and multivariate logistic regression analyses.

**On-line Table 8G: Results of univariate and multivariate analyses for the discrimination of AD from HS in test 8 when the smoothing kernel was set to 20 mm<sup>a</sup>**

|                     |                           | Univariate Analysis                         |         | Multivariate Analysis                       |         |
|---------------------|---------------------------|---------------------------------------------|---------|---------------------------------------------|---------|
|                     |                           | Likelihood Ratio<br>$\chi^2$ Test Statistic | P Value | Likelihood Ratio<br>$\chi^2$ Test Statistic | P Value |
| Modulation +<br>ROI | Amygdala                  | 60.49                                       | <.001   | 79.18                                       | <.001   |
|                     | Posterior cingulate gyrus | 1.85                                        | .174    |                                             |         |
|                     | Precuneus                 | 1.83                                        | .177    |                                             |         |
|                     | Hippocampus               | 18.59                                       | <.001   |                                             |         |
|                     | Parahippocampus           | 12.33                                       | <.001   |                                             |         |
|                     | Frontal lobe              | 5.42                                        | .020    |                                             |         |
|                     | Occipital lobe            | 1.61                                        | .204    |                                             |         |
|                     | Parietal lobe             | 13.84                                       | <.001   |                                             |         |
|                     | Temporal lobe             | 24.62                                       | <.001   |                                             |         |
| Age                 |                           | 0.18                                        | .667    |                                             |         |
| Modulation –<br>ROI | Amygdala                  | 63.35                                       | <.001   | 62.89                                       | <.001   |
|                     | Posterior cingulate gyrus | 0.50                                        | .478    |                                             |         |
|                     | Precuneus                 | 2.34                                        | .126    |                                             |         |
|                     | Hippocampus               | 28.32                                       | <.001   |                                             |         |
|                     | Parahippocampus           | 6.13                                        | .013    |                                             |         |
|                     | Frontal lobe              | 10.63                                       | .001    |                                             |         |
|                     | Occipital lobe            | 0.27                                        | .603    |                                             |         |
|                     | Parietal lobe             | 13.08                                       | <.001   |                                             |         |
|                     | Temporal lobe             | 26.62                                       | <.001   |                                             |         |
| Age                 |                           | 0.18                                        | .667    |                                             |         |

<sup>a</sup>Likelihood ratio  $\chi^2$  test statistic and *P* values were determined by univariate and multivariate logistic regression analyses.

**On-line Table 8H: Optimal ROI and diagnostic performance expressed as area under the curve for each image-processing setting in test 8<sup>a</sup>**

| Image-Processing Condition |                            | ROI                       | Likelihood Ratio<br>$\chi^2$ Test Statistic | P Value | AUC   |
|----------------------------|----------------------------|---------------------------|---------------------------------------------|---------|-------|
| Modulation                 | Smoothing Kernel Size (mm) |                           |                                             |         |       |
| +                          | Nonsmoothed                | Amygdala                  | 101.81                                      | <.001   | 0.832 |
|                            |                            | Posterior cingulate gyrus |                                             |         |       |
| +                          | 4                          | Amygdala                  | 106.28                                      | <.001   | 0.808 |
|                            |                            | Posterior cingulate gyrus |                                             |         |       |
|                            |                            | Parietal lobe             |                                             |         |       |
| +                          | 8                          | Amygdala                  | 102.31                                      | <.001   | 0.785 |
|                            |                            | Parietal lobe             |                                             |         |       |
| +                          | 12                         | Amygdala                  | 110.83                                      | <.001   | 0.863 |
|                            |                            | Frontal lobe              |                                             |         |       |
|                            |                            | Parietal lobe             |                                             |         |       |
| +                          | 16                         | Amygdala                  | 107.12                                      | <.001   | 0.844 |
|                            |                            | Frontal lobe              |                                             |         |       |
|                            |                            | Parietal lobe             |                                             |         |       |
| +                          | 20                         | Amygdala                  | 93.01                                       | <.001   | 0.785 |
|                            |                            | Parietal lobe             |                                             |         |       |
| –                          | Nonsmoothed                | Hippocampus               | 119.94                                      | <.001   | 0.871 |
|                            |                            | Precuneus                 |                                             |         |       |
| –                          | 4                          | Hippocampus               | 117.28                                      | <.001   | 0.852 |
|                            |                            | Precuneus                 |                                             |         |       |
|                            |                            | Parahippocampus           |                                             |         |       |
| –                          | 8                          | Amygdala                  | 105.42                                      | <.001   | 0.824 |
|                            |                            | Hippocampus               |                                             |         |       |
| –                          | 12                         | Parietal lobe             | 89.68                                       | <.001   | 0.797 |
|                            |                            | Amygdala                  |                                             |         |       |
|                            |                            | Hippocampus               |                                             |         |       |
| –                          | 16                         | Parietal lobe             | 82.79                                       | <.001   | 0.785 |
|                            |                            | Amygdala                  |                                             |         |       |
| –                          | 20                         | Parietal lobe             | 75.97                                       | <.001   | 0.770 |
|                            |                            | Amygdala                  |                                             |         |       |

<sup>a</sup>Likelihood ratio  $\chi^2$  test statistic and *P* values were determined by multivariate logistic regression analyses.



**On-line Table 9A: Clinical characteristics of the discovery (optimal setting determination) and validation (diagnostic performance test) groups in test 9**

|                        | Discovery Group |              |                    | Validation Group |             |                    |
|------------------------|-----------------|--------------|--------------------|------------------|-------------|--------------------|
|                        | AD (n = 143)    | HS (n = 143) | P Value            | AD (n = 15)      | HS (n = 15) | P Value            |
| Age (yr)               | 69 ± 8          | 68 ± 8       | .771 <sup>a</sup>  | 70 ± 8           | 68 ± 9      | .573 <sup>a</sup>  |
| Onset age (yr)         | 67 ± 8          | –            |                    | 68 ± 9           | –           |                    |
| Sex (M/F)              | 73:70           | 77:66        | .636 <sup>b</sup>  | 7:8              | 10:5        | .267 <sup>b</sup>  |
| MMSE                   | 21.9 ± 3.5      | 29.1 ± 0.7   | <.001 <sup>a</sup> | 20.4 ± 3.9       | 29.1 ± 0.8  | <.001 <sup>a</sup> |
| CDR (0.5/1)            | 17/126          | –            |                    | 3/12             | –           |                    |
| Term of education (yr) | 11.7 ± 2.6      | 12.3 ± 2.9   | .078 <sup>c</sup>  | 12.1 ± 2.5       | 12.3 ± 2.9  | .790 <sup>c</sup>  |

<sup>a</sup> ANOVA.

<sup>b</sup>  $\chi^2$  test.

<sup>c</sup> Kruskal-Wallis test.

**On-line Table 9B: Results of univariate and multivariate analyses for the discrimination of AD from HS in test 9 when the smoothing kernel was set to zero millimeters<sup>a</sup>**

|                     |                           | Univariate Analysis                         |         | Multivariate Analysis                       |         |
|---------------------|---------------------------|---------------------------------------------|---------|---------------------------------------------|---------|
|                     |                           | Likelihood Ratio<br>$\chi^2$ Test Statistic | P Value | Likelihood Ratio<br>$\chi^2$ Test Statistic | P Value |
| Modulation +<br>ROI | Amygdala                  | 78.44                                       | <.001   | 84.48                                       | <.001   |
|                     | Posterior cingulate gyrus | 12.95                                       | <.001   | 18.98                                       | <.001   |
|                     | Precuneus                 | 4.90                                        | .027    |                                             |         |
|                     | Hippocampus               | 50.18                                       | <.001   |                                             |         |
|                     | Parahippocampus           | 27.05                                       | <.001   |                                             |         |
|                     | Frontal lobe              | 0.44                                        | .505    |                                             |         |
|                     | Occipital lobe            | 2.12                                        | .145    |                                             |         |
|                     | Parietal lobe             | 5.71                                        | .017    |                                             |         |
|                     | Temporal lobe             | 7.36                                        | .007    |                                             |         |
| Age                 |                           | 0.09                                        | .770    |                                             |         |
| Modulation –<br>ROI | Amygdala                  | 15.70                                       | <.001   |                                             |         |
|                     | Posterior cingulate gyrus | 18.11                                       | <.001   |                                             |         |
|                     | Precuneus                 | 11.23                                       | .001    | 15.79                                       | <.001   |
|                     | Hippocampus               | 110.46                                      | <.001   | 115.03                                      | <.001   |
|                     | Parahippocampus           | 31.85                                       | <.001   |                                             |         |
|                     | Frontal lobe              | 1.02                                        | .314    |                                             |         |
|                     | Occipital lobe            | 0.65                                        | .422    |                                             |         |
|                     | Parietal lobe             | 5.09                                        | .024    |                                             |         |
|                     | Temporal lobe             | 4.07                                        | .044    |                                             |         |
| Age                 |                           | 0.09                                        | .770    |                                             |         |

<sup>a</sup> Likelihood ratio  $\chi^2$  test statistic and P values were determined by univariate and multivariate logistic regression analyses.

**On-line Table 9C: Results of univariate and multivariate analyses for the discrimination of AD from HS in test 9 when the smoothing kernel was set to 4 mm<sup>a</sup>**

|                     |                           | Univariate Analysis                         |         | Multivariate Analysis                       |         |
|---------------------|---------------------------|---------------------------------------------|---------|---------------------------------------------|---------|
|                     |                           | Likelihood Ratio<br>$\chi^2$ Test Statistic | P Value | Likelihood Ratio<br>$\chi^2$ Test Statistic | P Value |
| Modulation +<br>ROI | Amygdala                  | 80.13                                       | <.001   | 85.71                                       | <.001   |
|                     | Posterior cingulate gyrus | 9.03                                        | .003    |                                             |         |
|                     | Precuneus                 | 4.11                                        | .043    |                                             |         |
|                     | Hippocampus               | 31.94                                       | <.001   |                                             |         |
|                     | Parahippocampus           | 28.28                                       | <.001   |                                             |         |
|                     | Frontal lobe              | 2.99                                        | .084    |                                             |         |
|                     | Occipital lobe            | 1.11                                        | .292    |                                             |         |
|                     | Parietal lobe             | 10.93                                       | .001    |                                             |         |
|                     | Temporal lobe             | 15.95                                       | <.001   |                                             |         |
| Age                 |                           | 0.09                                        | .770    |                                             |         |
| Modulation –<br>ROI | Amygdala                  | 28.43                                       | <.001   | 11.40                                       | .001    |
|                     | Posterior cingulate gyrus | 6.33                                        | .012    |                                             |         |
|                     | Precuneus                 | 10.16                                       | .001    |                                             |         |
|                     | Hippocampus               | 100.85                                      | <.001   |                                             |         |
|                     | Parahippocampus           | 31.99                                       | <.001   |                                             |         |
|                     | Frontal lobe              | 3.82                                        | .051    |                                             |         |
|                     | Occipital lobe            | 0.03                                        | .872    |                                             |         |
|                     | Parietal lobe             | 5.40                                        | .020    |                                             |         |
|                     | Temporal lobe             | 10.36                                       | .001    |                                             |         |
| Age                 |                           | 0.09                                        | .770    |                                             |         |

<sup>a</sup> Likelihood ratio  $\chi^2$  test statistic and *P* values were determined by univariate and multivariate logistic regression analyses.

**On-line Table 9D: Results of univariate and multivariate analyses for the discrimination of AD from HS in test 9 when the smoothing kernel was set to 8 mm<sup>a</sup>**

|                     |                           | Univariate Analysis                         |         | Multivariate Analysis                       |         |
|---------------------|---------------------------|---------------------------------------------|---------|---------------------------------------------|---------|
|                     |                           | Likelihood Ratio<br>$\chi^2$ Test Statistic | P Value | Likelihood Ratio<br>$\chi^2$ Test Statistic | P Value |
| Modulation +<br>ROI | Amygdala                  | 79.42                                       | <.001   | 90.97                                       | <.001   |
|                     | Posterior cingulate gyrus | 7.08                                        | .008    |                                             |         |
|                     | Precuneus                 | 2.62                                        | .106    |                                             |         |
|                     | Hippocampus               | 23.93                                       | <.001   |                                             |         |
|                     | Parahippocampus           | 25.78                                       | <.001   |                                             |         |
|                     | Frontal lobe              | 6.04                                        | .014    |                                             |         |
|                     | Occipital lobe            | 1.27                                        | .259    |                                             |         |
|                     | Parietal lobe             | 10.64                                       | .001    |                                             |         |
|                     | Temporal lobe             | 18.20                                       | <.001   |                                             |         |
| Age                 |                           | 0.09                                        | .770    |                                             |         |
| Modulation –<br>ROI | Amygdala                  | 49.47                                       | <.001   | 83.54                                       | <.001   |
|                     | Posterior cingulate gyrus | 1.30                                        | .254    |                                             |         |
|                     | Precuneus                 | 6.82                                        | .009    |                                             |         |
|                     | Hippocampus               | 88.06                                       | <.001   |                                             |         |
|                     | Parahippocampus           | 21.67                                       | <.001   |                                             |         |
|                     | Frontal lobe              | 9.06                                        | .003    |                                             |         |
|                     | Occipital lobe            | 0.55                                        | .457    |                                             |         |
|                     | Parietal lobe             | 15.44                                       | <.001   |                                             |         |
|                     | Temporal lobe             | 18.48                                       | <.001   |                                             |         |
| Age                 |                           | 0.09                                        | .770    |                                             |         |

<sup>a</sup> Likelihood ratio  $\chi^2$  test statistic and *P* values were determined by univariate and multivariate logistic regression analyses.

**On-line Table 9E: Results of univariate and multivariate analyses for the discrimination of AD from HS in test 9 when the smoothing kernel was set to 12 mm<sup>a</sup>**

|                     |                           | Univariate Analysis                         |         | Multivariate Analysis                       |         |
|---------------------|---------------------------|---------------------------------------------|---------|---------------------------------------------|---------|
|                     |                           | Likelihood Ratio<br>$\chi^2$ Test Statistic | P Value | Likelihood Ratio<br>$\chi^2$ Test Statistic | P Value |
| Modulation +<br>ROI | Amygdala                  | 76.39                                       | <.001   | 91.07                                       | <.001   |
|                     | Posterior cingulate gyrus | 5.82                                        | .016    |                                             |         |
|                     | Precuneus                 | 2.78                                        | .096    |                                             |         |
|                     | Hippocampus               | 20.51                                       | <.001   |                                             |         |
|                     | Parahippocampus           | 19.71                                       | <.001   |                                             |         |
|                     | Frontal lobe              | 6.84                                        | .009    |                                             |         |
|                     | Occipital lobe            | 1.46                                        | .227    |                                             |         |
|                     | Parietal lobe             | 13.56                                       | <.001   |                                             |         |
|                     | Temporal lobe             | 20.70                                       | <.001   |                                             |         |
| Age                 | 0.09                      | .770                                        |         |                                             |         |
| Modulation –<br>ROI | Amygdala                  | 66.18                                       | <.001   | 18.19                                       | <.001   |
|                     | Posterior cingulate gyrus | <.01                                        | .978    |                                             |         |
|                     | Precuneus                 | 4.71                                        | .030    |                                             |         |
|                     | Hippocampus               | 58.24                                       | <.001   |                                             |         |
|                     | Parahippocampus           | 12.25                                       | .001    |                                             |         |
|                     | Frontal lobe              | 10.69                                       | .001    |                                             |         |
|                     | Occipital lobe            | 0.54                                        | .461    |                                             |         |
|                     | Parietal lobe             | 15.44                                       | <.001   |                                             |         |
|                     | Temporal lobe             | 21.10                                       | <.001   |                                             |         |
| Age                 | 0.09                      | .770                                        |         |                                             |         |

<sup>a</sup> Likelihood ratio  $\chi^2$  test statistic and *P* values were determined by univariate and multivariate logistic regression analyses.

**On-line Table 9F: Results of univariate and multivariate analyses for the discrimination of AD from HS in test 9 when the smoothing kernel was set to 16 mm<sup>a</sup>**

|                     |                           | Univariate Analysis                         |         | Multivariate Analysis                       |         |
|---------------------|---------------------------|---------------------------------------------|---------|---------------------------------------------|---------|
|                     |                           | Likelihood Ratio<br>$\chi^2$ Test Statistic | P Value | Likelihood Ratio<br>$\chi^2$ Test Statistic | P Value |
| Modulation +<br>ROI | Amygdala                  | 71.11                                       | <.001   | 86.87                                       | <.001   |
|                     | Posterior cingulate gyrus | 4.38                                        | .036    |                                             |         |
|                     | Precuneus                 | 2.63                                        | .105    |                                             |         |
|                     | Hippocampus               | 18.83                                       | <.001   |                                             |         |
|                     | Parahippocampus           | 15.65                                       | <.001   |                                             |         |
|                     | Frontal lobe              | 6.08                                        | .014    |                                             |         |
|                     | Occipital lobe            | 1.55                                        | .213    |                                             |         |
|                     | Parietal lobe             | 15.81                                       | <.001   |                                             |         |
|                     | Temporal lobe             | 22.18                                       | <.001   |                                             |         |
| Age                 | 0.09                      | .770                                        |         |                                             |         |
| Modulation –<br>ROI | Amygdala                  | 65.97                                       | <.001   | 65.66                                       | <.001   |
|                     | Posterior cingulate gyrus | 0.42                                        | .516    |                                             |         |
|                     | Precuneus                 | 4.36                                        | .037    |                                             |         |
|                     | Hippocampus               | 34.43                                       | <.001   |                                             |         |
|                     | Parahippocampus           | 5.56                                        | .018    |                                             |         |
|                     | Frontal lobe              | 12.76                                       | <.001   |                                             |         |
|                     | Occipital lobe            | 1.18                                        | .277    |                                             |         |
|                     | Parietal lobe             | 15.52                                       | <.001   |                                             |         |
|                     | Temporal lobe             | 22.84                                       | <.001   |                                             |         |
| Age                 | 0.09                      | .770                                        |         |                                             |         |

<sup>a</sup> Likelihood ratio  $\chi^2$  test statistic and *P* values were determined by univariate and multivariate logistic regression analyses.

**On-line Table 9G: Results of univariate and multivariate analyses for the discrimination of AD from HS in test 9 when the smoothing kernel was set to 20 mm<sup>a</sup>**

|                     |                           | Univariate Analysis                         |         | Multivariate Analysis                       |         |       |       |
|---------------------|---------------------------|---------------------------------------------|---------|---------------------------------------------|---------|-------|-------|
|                     |                           | Likelihood Ratio<br>$\chi^2$ Test Statistic | P Value | Likelihood Ratio<br>$\chi^2$ Test Statistic | P Value |       |       |
| Modulation +<br>ROI | Amygdala                  | 64.97                                       | <.001   | 80.64                                       | <.001   |       |       |
|                     | Posterior cingulate gyrus | 1.99                                        | .159    |                                             |         |       |       |
|                     | Precuneus                 | 2.21                                        | .137    |                                             |         |       |       |
|                     | Hippocampus               | 18.94                                       | <.001   |                                             |         |       |       |
|                     | Parahippocampus           | 13.15                                       | <.001   |                                             |         |       |       |
|                     | Frontal lobe              | 6.11                                        | .014    |                                             |         | 7.47  | .006  |
|                     | Occipital lobe            | 1.14                                        | .286    |                                             |         |       |       |
|                     | Parietal lobe             | 16.08                                       | <.001   |                                             |         |       |       |
|                     | Temporal lobe             | 25.19                                       | <.001   |                                             |         | 27.15 | <.001 |
| Age                 | 0.09                      | .770                                        |         |                                             |         |       |       |
| Modulation –<br>ROI | Amygdala                  | 58.23                                       | <.001   | 60.16                                       | <.001   |       |       |
|                     | Posterior cingulate gyrus | 0.48                                        | .490    |                                             |         |       |       |
|                     | Precuneus                 | 4.75                                        | .029    |                                             |         |       |       |
|                     | Hippocampus               | 23.87                                       | <.001   |                                             |         |       |       |
|                     | Parahippocampus           | 3.95                                        | .047    |                                             |         |       |       |
|                     | Frontal lobe              | 11.71                                       | .001    |                                             |         |       |       |
|                     | Occipital lobe            | 1.06                                        | .304    |                                             |         |       |       |
|                     | Parietal lobe             | 14.81                                       | <.001   |                                             |         | 16.74 | <.001 |
|                     | Temporal lobe             | 20.91                                       | <.001   |                                             |         |       |       |
| Age                 | 0.09                      | .770                                        |         |                                             |         |       |       |

<sup>a</sup> Likelihood ratio  $\chi^2$  test statistic and *P* values were determined by univariate and multivariate logistic regression analyses.

**On-line Table 9H: Optimal ROI and diagnostic performance expressed as area under the curve for each image-processing setting in test 9<sup>a</sup>**

| Modulation | Image-Processing Condition |                            | ROI                       | Likelihood Ratio<br>$\chi^2$ Test Statistic | P Value | AUC   |
|------------|----------------------------|----------------------------|---------------------------|---------------------------------------------|---------|-------|
|            |                            | Smoothing Kernel Size (mm) |                           |                                             |         |       |
| +          |                            | Nonsmoothed                | Amygdala                  | 92.42                                       | <.001   | 0.858 |
|            |                            |                            | Posterior cingulate gyrus |                                             |         |       |
| +          |                            | 4                          | Amygdala                  | 96.64                                       | <.001   | 0.876 |
|            |                            |                            | Parietal lobe             |                                             |         |       |
| +          |                            | 8                          | Amygdala                  | 109.00                                      | <.001   | 0.853 |
|            |                            |                            | Frontal lobe              |                                             |         |       |
| +          |                            | 12                         | Parietal lobe             | 112.28                                      | <.001   | 0.813 |
|            |                            |                            | Amygdala                  |                                             |         |       |
| +          |                            | 16                         | Frontal lobe              | 108.62                                      | <.001   | 0.800 |
|            |                            |                            | Parietal lobe             |                                             |         |       |
| +          |                            | 20                         | Amygdala                  | 102.15                                      | <.001   | 0.756 |
|            |                            |                            | Frontal lobe              |                                             |         |       |
| –          |                            | Nonsmoothed                | Parietal lobe             | 126.26                                      | <.001   | 0.851 |
|            |                            |                            | Hippocampus               |                                             |         |       |
| –          |                            | 4                          | Precuneus                 | 112.25                                      | <.001   | 0.849 |
|            |                            |                            | Hippocampus               |                                             |         |       |
| –          |                            | 8                          | Precuneus                 | 98.98                                       | <.001   | 0.833 |
|            |                            |                            | Hippocampus               |                                             |         |       |
| –          |                            | 12                         | Parietal lobe             | 89.53                                       | <.001   | 0.840 |
|            |                            |                            | Amygdala                  |                                             |         |       |
| –          |                            | 16                         | Hippocampus               | 81.19                                       | <.001   | 0.800 |
|            |                            |                            | Parietal lobe             |                                             |         |       |
| –          |                            | 20                         | Amygdala                  | 74.97                                       | <.001   | 0.756 |
|            |                            |                            | Parietal lobe             |                                             |         |       |

<sup>a</sup> Likelihood ratio  $\chi^2$  test statistic and *P* values were determined by multivariate logistic regression analyses.

**On-line Table 10A: Clinical characteristics of the discovery (optimal setting determination) and validation (diagnostic performance test) groups in test 10**

|                        | Discovery Group |              |                    | Validation Group |             |                    |
|------------------------|-----------------|--------------|--------------------|------------------|-------------|--------------------|
|                        | AD (n = 143)    | HS (n = 143) | P Value            | AD (n = 15)      | HS (n = 15) | P Value            |
| Age (yr)               | 69 ± 8          | 68 ± 7       | .578 <sup>a</sup>  | 69 ± 8           | 69 ± 7      | .820 <sup>a</sup>  |
| Onset age (yr)         | 67 ± 8          | –            |                    | 66 ± 8           | –           |                    |
| Sex (M/F)              | 70:73           | 77:66        | .408 <sup>b</sup>  | 10:5             | 10:5        | 1.000 <sup>b</sup> |
| MMSE                   | 21.6 ± 3.6      | 29.1 ± 0.7   | <.001 <sup>a</sup> | 23.2 ± 2.9       | 28.9 ± 0.6  | <.001 <sup>a</sup> |
| CDR (0.5/1)            | 20/123          | –            |                    | 0/15             | –           |                    |
| Term of education (yr) | 11.7 ± 2.6      | 12.3 ± 2.9   | .076 <sup>c</sup>  | 12.1 ± 2.6       | 12.3 ± 2.5  | .833 <sup>c</sup>  |

<sup>a</sup> ANOVA.

<sup>b</sup>  $\chi^2$  test.

<sup>c</sup> Kruskal-Wallis test.

**On-line Table 10B: Results of univariate and multivariate analyses for the discrimination of AD from HS in test 10 when the smoothing kernel was set to zero millimeters<sup>a</sup>**

|                     |                           | Univariate Analysis                         |         | Multivariate Analysis                       |         |
|---------------------|---------------------------|---------------------------------------------|---------|---------------------------------------------|---------|
|                     |                           | Likelihood Ratio<br>$\chi^2$ Test Statistic | P Value | Likelihood Ratio<br>$\chi^2$ Test Statistic | P Value |
| Modulation +<br>ROI | Amygdala                  | 85.29                                       | <.001   | 92.63                                       | <.001   |
|                     | Posterior cingulate gyrus | 9.68                                        | .002    | 17.03                                       | <.001   |
|                     | Precuneus                 | 2.08                                        | .149    |                                             |         |
|                     | Hippocampus               | 58.93                                       | <.001   |                                             |         |
|                     | Parahippocampus           | 31.42                                       | <.001   |                                             |         |
|                     | Frontal lobe              | 0.42                                        | .519    |                                             |         |
|                     | Occipital lobe            | 2.97                                        | .085    |                                             |         |
|                     | Parietal lobe             | 4.28                                        | .039    |                                             |         |
|                     | Temporal lobe             | 8.86                                        | .003    |                                             |         |
| Age                 |                           | 0.31                                        | .576    |                                             |         |
| Modulation –<br>ROI | Amygdala                  | 21.13                                       | <.001   |                                             |         |
|                     | Posterior cingulate gyrus | 12.82                                       | <.001   |                                             |         |
|                     | Precuneus                 | 7.64                                        | .006    | 11.94                                       | .001    |
|                     | Hippocampus               | 115.51                                      | <.001   | 119.81                                      | <.001   |
|                     | Parahippocampus           | 37.50                                       | <.001   |                                             |         |
|                     | Frontal lobe              | 0.42                                        | .519    |                                             |         |
|                     | Occipital lobe            | 0.29                                        | .592    |                                             |         |
|                     | Parietal lobe             | 4.27                                        | .039    |                                             |         |
|                     | Temporal lobe             | 6.51                                        | .011    |                                             |         |
| Age                 |                           | 0.31                                        | .576    |                                             |         |

<sup>a</sup> Likelihood ratio  $\chi^2$  test statistic and P values were determined by univariate and multivariate logistic regression analyses.

**On-line Table 10C: Results of univariate and multivariate analyses for the discrimination of AD from HS in test 10 when the smoothing kernel was set to 4 mm<sup>a</sup>**

|                     |                           | Univariate Analysis                         |         | Multivariate Analysis                       |         |
|---------------------|---------------------------|---------------------------------------------|---------|---------------------------------------------|---------|
|                     |                           | Likelihood Ratio<br>$\chi^2$ Test Statistic | P Value | Likelihood Ratio<br>$\chi^2$ Test Statistic | P Value |
| Modulation +<br>ROI | Amygdala                  | 85.18                                       | <.001   | 94.40                                       | <.001   |
|                     | Posterior cingulate gyrus | 7.23                                        | .007    |                                             |         |
|                     | Precuneus                 | 1.83                                        | .176    |                                             |         |
|                     | Hippocampus               | 38.70                                       | <.001   |                                             |         |
|                     | Parahippocampus           | 30.61                                       | <.001   |                                             |         |
|                     | Frontal lobe              | 2.80                                        | .094    |                                             |         |
|                     | Occipital lobe            | 1.65                                        | .199    |                                             |         |
|                     | Parietal lobe             | 8.69                                        | .003    |                                             |         |
|                     | Temporal lobe             | 15.31                                       | <.001   |                                             |         |
| Age                 |                           | 0.31                                        | .576    |                                             |         |
| Modulation –<br>ROI | Amygdala                  | 35.75                                       | <.001   | 8.30                                        | .004    |
|                     | Posterior cingulate gyrus | 3.69                                        | .055    |                                             |         |
|                     | Precuneus                 | 6.77                                        | .009    |                                             |         |
|                     | Hippocampus               | 103.43                                      | <.001   |                                             |         |
|                     | Parahippocampus           | 36.26                                       | <.001   |                                             |         |
|                     | Frontal lobe              | 2.66                                        | .103    |                                             |         |
|                     | Occipital lobe            | 0.04                                        | .839    |                                             |         |
|                     | Parietal lobe             | 8.51                                        | .004    |                                             |         |
|                     | Temporal lobe             | 12.52                                       | <.001   |                                             |         |
| Age                 |                           | 0.31                                        | .576    |                                             |         |

<sup>a</sup> Likelihood ratio  $\chi^2$  test statistic and *P* values were determined by univariate and multivariate logistic regression analyses.

**On-line Table 10D: Results of univariate and multivariate analyses for the discrimination of AD from HS in test 10 when the smoothing kernel was set to 8 mm<sup>a</sup>**

|                     |                           | Univariate Analysis                         |         | Multivariate Analysis                       |         |
|---------------------|---------------------------|---------------------------------------------|---------|---------------------------------------------|---------|
|                     |                           | Likelihood Ratio<br>$\chi^2$ Test Statistic | P Value | Likelihood Ratio<br>$\chi^2$ Test Statistic | P Value |
| Modulation +<br>ROI | Amygdala                  | 82.81                                       | <.001   | 97.25                                       | <.001   |
|                     | Posterior cingulate gyrus | 4.54                                        | .033    |                                             |         |
|                     | Precuneus                 | 0.90                                        | .343    |                                             |         |
|                     | Hippocampus               | 28.45                                       | <.001   |                                             |         |
|                     | Parahippocampus           | 24.93                                       | <.001   |                                             |         |
|                     | Frontal lobe              | 5.51                                        | .019    |                                             |         |
|                     | Occipital lobe            | 2.06                                        | .151    |                                             |         |
|                     | Parietal lobe             | 8.49                                        | .004    |                                             |         |
|                     | Temporal lobe             | 17.44                                       | <.001   |                                             |         |
| Age                 |                           | 0.31                                        | .576    |                                             |         |
| Modulation –<br>ROI | Amygdala                  | 55.86                                       | <.001   | 7.37                                        | .007    |
|                     | Posterior cingulate gyrus | 0.74                                        | .390    |                                             |         |
|                     | Precuneus                 | 5.08                                        | .024    |                                             |         |
|                     | Hippocampus               | 88.22                                       | <.001   |                                             |         |
|                     | Parahippocampus           | 20.55                                       | <.001   |                                             |         |
|                     | Frontal lobe              | 7.60                                        | .006    |                                             |         |
|                     | Occipital lobe            | 0.11                                        | .743    |                                             |         |
|                     | Parietal lobe             | 13.31                                       | <.001   |                                             |         |
|                     | Temporal lobe             | 23.38                                       | <.001   |                                             |         |
| Age                 |                           | 0.31                                        | .576    |                                             |         |

<sup>a</sup> Likelihood ratio  $\chi^2$  test statistic and *P* values were determined by univariate and multivariate logistic regression analyses.

**On-line Table 10E: Results of univariate and multivariate analyses for the discrimination of AD from HS in test 10 when the smoothing kernel was set to 12 mm<sup>a</sup>**

|                     |                           | Univariate Analysis                         |         | Multivariate Analysis                       |         |       |       |
|---------------------|---------------------------|---------------------------------------------|---------|---------------------------------------------|---------|-------|-------|
|                     |                           | Likelihood Ratio<br>$\chi^2$ Test Statistic | P Value | Likelihood Ratio<br>$\chi^2$ Test Statistic | P Value |       |       |
| Modulation +<br>ROI | Amygdala                  | 77.31                                       | <.001   | 95.33                                       | <.001   |       |       |
|                     | Posterior cingulate gyrus | 2.86                                        | .091    |                                             |         |       |       |
|                     | Precuneus                 | 0.99                                        | .320    |                                             |         |       |       |
|                     | Hippocampus               | 23.35                                       | <.001   |                                             |         |       |       |
|                     | Parahippocampus           | 17.80                                       | <.001   |                                             |         |       |       |
|                     | Frontal lobe              | 6.00                                        | .014    |                                             |         | 10.42 | .001  |
|                     | Occipital lobe            | 2.24                                        | .135    |                                             |         |       |       |
|                     | Parietal lobe             | 10.49                                       | .001    |                                             |         | 23.77 | <.001 |
|                     | Temporal lobe             | 20.09                                       | <.001   |                                             |         |       |       |
| Age                 | 0.31                      | .576                                        |         |                                             |         |       |       |
| Modulation –<br>ROI | Amygdala                  | 68.49                                       | <.001   | 21.19                                       | <.001   |       |       |
|                     | Posterior cingulate gyrus | 0.38                                        | .538    |                                             |         |       |       |
|                     | Precuneus                 | 2.96                                        | .085    |                                             |         |       |       |
|                     | Hippocampus               | 88.22                                       | <.001   |                                             |         | 6.49  | .011  |
|                     | Parahippocampus           | 20.55                                       | <.001   |                                             |         |       |       |
|                     | Frontal lobe              | 7.60                                        | .006    |                                             |         |       |       |
|                     | Occipital lobe            | 0.11                                        | .743    |                                             |         |       |       |
|                     | Parietal lobe             | 13.59                                       | <.001   |                                             |         | 12.28 | .001  |
|                     | Temporal lobe             | 25.07                                       | <.001   |                                             |         |       |       |
| Age                 | 0.31                      | .576                                        |         |                                             |         |       |       |

<sup>a</sup> Likelihood ratio  $\chi^2$  test statistic and P values were determined by univariate and multivariate logistic regression analyses.

**On-line Table 10F: Results of univariate and multivariate analyses for the discrimination of AD from HS in test 10 when the smoothing kernel was set to 16 mm<sup>a</sup>**

|                     |                           | Univariate Analysis                         |         | Multivariate Analysis                       |         |       |       |
|---------------------|---------------------------|---------------------------------------------|---------|---------------------------------------------|---------|-------|-------|
|                     |                           | Likelihood Ratio<br>$\chi^2$ Test Statistic | P Value | Likelihood Ratio<br>$\chi^2$ Test Statistic | P Value |       |       |
| Modulation +<br>ROI | Amygdala                  | 69.92                                       | <.001   | 88.86                                       | <.001   |       |       |
|                     | Posterior cingulate gyrus | 1.62                                        | .201    |                                             |         |       |       |
|                     | Precuneus                 | 0.87                                        | .352    |                                             |         |       |       |
|                     | Hippocampus               | 20.18                                       | <.001   |                                             |         |       |       |
|                     | Parahippocampus           | 13.20                                       | <.001   |                                             |         |       |       |
|                     | Frontal lobe              | 5.62                                        | .018    |                                             |         | 8.90  | .003  |
|                     | Occipital lobe            | 2.04                                        | .153    |                                             |         |       |       |
|                     | Parietal lobe             | 12.20                                       | .001    |                                             |         | 25.30 | <.001 |
|                     | Temporal lobe             | 21.17                                       | <.001   |                                             |         |       |       |
| Age                 | 0.31                      | .576                                        |         |                                             |         |       |       |
| Modulation –<br>ROI | Amygdala                  | 63.50                                       | <.001   | 63.29                                       | <.001   |       |       |
|                     | Posterior cingulate gyrus | 1.56                                        | .211    |                                             |         |       |       |
|                     | Precuneus                 | 2.25                                        | .134    |                                             |         |       |       |
|                     | Hippocampus               | 29.97                                       | <.001   |                                             |         |       |       |
|                     | Parahippocampus           | 3.17                                        | .075    |                                             |         |       |       |
|                     | Frontal lobe              | 10.66                                       | .001    |                                             |         |       |       |
|                     | Occipital lobe            | 0.05                                        | .819    |                                             |         |       |       |
|                     | Parietal lobe             | 13.82                                       | <.001   |                                             |         | 13.61 | <.001 |
|                     | Temporal lobe             | 25.03                                       | <.001   |                                             |         |       |       |
| Age                 | 0.31                      | .576                                        |         |                                             |         |       |       |

<sup>a</sup> Likelihood ratio  $\chi^2$  test statistic and P values were determined by univariate and multivariate logistic regression analyses.

**On-line Table 10G: Results of univariate and multivariate analyses for the discrimination of AD from HS in test 10 when the smoothing kernel was set to 20 mm<sup>a</sup>**

|                     |                           | Univariate Analysis                         |         | Multivariate Analysis                       |         |       |       |
|---------------------|---------------------------|---------------------------------------------|---------|---------------------------------------------|---------|-------|-------|
|                     |                           | Likelihood Ratio<br>$\chi^2$ Test Statistic | P Value | Likelihood Ratio<br>$\chi^2$ Test Statistic | P Value |       |       |
| Modulation +<br>ROI | Amygdala                  | 62.17                                       | <.001   | 68.78                                       | <.001   |       |       |
|                     | Posterior cingulate gyrus | 0.20                                        | .656    |                                             |         |       |       |
|                     | Precuneus                 | 0.62                                        | .433    |                                             |         |       |       |
|                     | Hippocampus               | 19.21                                       | <.001   |                                             |         |       |       |
|                     | Parahippocampus           | 11.01                                       | .001    |                                             |         |       |       |
|                     | Frontal lobe              | 5.87                                        | .015    |                                             |         | 8.60  | .003  |
|                     | Occipital lobe            | 1.92                                        | .166    |                                             |         |       |       |
|                     | Parietal lobe             | 11.85                                       | .001    |                                             |         | 24.02 | <.001 |
|                     | Temporal lobe             | 22.37                                       | <.001   |                                             |         |       |       |
| Age                 |                           | 0.31                                        | .576    |                                             |         |       |       |
| Modulation –<br>ROI | Amygdala                  | 53.38                                       | <.001   | 54.67                                       | <.001   |       |       |
|                     | Posterior cingulate gyrus | 1.52                                        | .217    |                                             |         |       |       |
|                     | Precuneus                 | 2.42                                        | .119    |                                             |         |       |       |
|                     | Hippocampus               | 19.32                                       | <.001   |                                             |         |       |       |
|                     | Parahippocampus           | 1.75                                        | .186    |                                             |         |       |       |
|                     | Frontal lobe              | 10.09                                       | .002    |                                             |         |       |       |
|                     | Occipital lobe            | <.01                                        | .966    |                                             |         |       |       |
|                     | Parietal lobe             | 13.43                                       | <.001   |                                             |         | 14.71 | <.001 |
|                     | Temporal lobe             | 22.53                                       | <.001   |                                             |         |       |       |
| Age                 |                           | 0.31                                        | .576    |                                             |         |       |       |

<sup>a</sup> Likelihood ratio  $\chi^2$  test statistic and *P* values were determined by univariate and multivariate logistic regression.

**On-line Table 10H: Optimal ROI and diagnostic performance expressed as area under the curve for each image-processing setting in test 10<sup>a</sup>**

| Image-Processing Condition |                            | ROI                       | Likelihood Ratio<br>$\chi^2$ Test Statistic | P Value | AUC   |
|----------------------------|----------------------------|---------------------------|---------------------------------------------|---------|-------|
| Modulation                 | Smoothing Kernel Size (mm) |                           |                                             |         |       |
| +                          | Nonsmoothed                | Amygdala                  | 102.32                                      | <.001   | 0.778 |
|                            |                            | Posterior cingulate gyrus |                                             |         |       |
| +                          | 4                          | Amygdala                  | 103.09                                      | <.001   | 0.742 |
|                            |                            | Parietal lobe             |                                             |         |       |
| +                          | 8                          | Amygdala                  | 111.84                                      | <.001   | 0.787 |
|                            |                            | Frontal lobe              |                                             |         |       |
| +                          | 12                         | Parietal lobe             | 111.93                                      | <.001   | 0.827 |
|                            |                            | Amygdala                  |                                             |         |       |
| +                          | 16                         | Frontal lobe              | 106.08                                      | <.001   | 0.831 |
|                            |                            | Parietal lobe             |                                             |         |       |
| +                          | 20                         | Amygdala                  | 98.60                                       | <.001   | 0.818 |
|                            |                            | Parahippocampus           |                                             |         |       |
| –                          | Nonsmoothed                | Parietal lobe             | 127.45                                      | <.001   | 0.787 |
|                            |                            | Hippocampus               |                                             |         |       |
| –                          | 4                          | Precuneus                 | 111.73                                      | <.001   | 0.804 |
|                            |                            | Hippocampus               |                                             |         |       |
| –                          | 8                          | Precuneus                 | 105.83                                      | <.001   | 0.827 |
|                            |                            | Amygdala                  |                                             |         |       |
| –                          | 12                         | Hippocampus               | 87.72                                       | <.001   | 0.831 |
|                            |                            | Parietal lobe             |                                             |         |       |
| –                          | 16                         | Amygdala                  | 77.11                                       | <.001   | 0.840 |
|                            |                            | Hippocampus               |                                             |         |       |
| –                          | 20                         | Parietal lobe             | 68.10                                       | <.001   | 0.893 |
|                            |                            | Amygdala                  |                                             |         |       |
|                            |                            | Parietal lobe             |                                             |         |       |

<sup>a</sup> Likelihood ratio  $\chi^2$  test statistic and *P* values were determined by multivariate logistic regression analyses.
